# Supplementary material for: Whole blood transcriptional signatures associated with rapid antidepressant response to ketamine in patients with treatment resistant depression
Source: PubMed Central journal article supplement (PMC8748646; doi:10.1038/s41398-021-01712-0), 2022-01-10
Supplement: 41398_2021_1712_MOESM3_ESM.pdf [file 41398_2021_1712_MOESM3_ESM.pdf]

Baseline TRD vs. HC

| Gene ID         | Gene Name  | Base Mean   | log2 Fold Change | p-value     |
|-----------------|------------|-------------|------------------|-------------|
| ENSG00000200087 | SNORA73B   | 219.1423864 | -1.809810018     | 0.023210495 |
| ENSG00000230076 | RPL10P6    | 214.1557388 | -1.726692752     | 0.012672226 |
| ENSG00000255893 | AP000786.1 | 22.18367837 | -1.566781604     | 0.000524284 |
| ENSG00000234449 | FAM239A    | 72.21721869 | -1.562589644     | 0.001690464 |
| ENSG00000236242 | MYO16-AS1  | 20.61983994 | -1.424713658     | 0.010893509 |
| ENSG00000166831 | RBPMS2     | 84.70977461 | -1.337156461     | 0.003962405 |
| ENSG00000203801 | LINC00222  | 8.415550844 | -1.311293366     | 0.000895148 |
| ENSG00000074410 | CA12       | 10.44025701 | -1.253624432     | 7.40E-06    |
| ENSG00000152463 | OLAH       | 26.35822973 | -1.210426178     | 0.025906653 |
| ENSG00000146122 | DAAM2      | 302.886716  | -1.126446667     | 0.017244073 |
| ENSG00000263812 | LINC00908  | 19.48099635 | -1.125078673     | 0.000652244 |
| ENSG00000261055 | AL450468.2 | 10.8982335  | -1.107721711     | 0.000408472 |
| ENSG00000249835 | VCAN-AS1   | 15.99315303 | -1.082223821     | 0.024110982 |
| ENSG00000270550 | IGHV3-30   | 16.53265346 | -1.080316644     | 0.005153374 |
| ENSG00000200204 | RNU1-22P   | 16.62289176 | -1.06795971      | 0.000348428 |
| ENSG00000120156 | TEK        | 51.41195849 | -1.058935072     | 0.016442274 |
| ENSG00000180535 | BHLHA15    | 15.36704491 | -1.053413323     | 0.021768301 |
| ENSG00000268199 | AC010335.1 | 11.14075695 | -1.048386715     | 0.006103586 |
| ENSG00000263464 | PPIAL4C    | 13.04508252 | -1.039408331     | 0.002167989 |
| ENSG00000163431 | LMOD1      | 9.712884618 | -1.02430935      | 0.009896394 |
| ENSG00000041515 | MYO16      | 16.06993399 | -1.01909738      | 0.004287959 |
| ENSG00000162594 | IL23R      | 17.41668059 | -1.003024632     | 0.020217058 |
| ENSG00000211941 | IGHV3-11   | 35.68728756 | -0.999487705     | 0.014592987 |
| ENSG00000175899 | A2M        | 97.53062019 | -0.985657697     | 0.024425453 |
| ENSG00000100196 | KDEL3      | 16.06308234 | -0.983596587     | 0.008094145 |
| ENSG00000136848 | DAB2IP     | 59.5480675  | -0.982717489     | 0.00638941  |
| ENSG00000237879 | LINC00398  | 14.96821655 | -0.970428111     | 0.000309388 |
| ENSG00000260075 | AC217777.1 | 22.01639966 | -0.964356602     | 0.048198156 |
| ENSG00000154165 | GPR15      | 201.4589046 | -0.960109106     | 0.016839731 |
| ENSG00000178445 | GLDC       | 48.02053385 | -0.958597553     | 0.028000937 |
| ENSG00000188056 | TREML4     | 493.3974375 | -0.954851194     | 0.04567625  |
| ENSG00000125845 | BMP2       | 13.49874097 | -0.943183416     | 0.038579631 |
| ENSG00000169607 | CKAP2L     | 17.78610963 | -0.940087945     | 0.002492497 |
| ENSG00000236679 | RPL23AP24  | 7.908786872 | -0.93903062      | 0.019045613 |
| ENSG00000103723 | AP3B2      | 33.28553566 | -0.932019894     | 0.009775213 |
| ENSG00000187166 | H1FNT      | 15.88091142 | -0.920786805     | 0.002299393 |
| ENSG00000224207 | AC018797.1 | 9.644814559 | -0.903397298     | 0.027709692 |
| ENSG00000230359 | TPI1P2     | 9.244508009 | -0.899652109     | 0.005966758 |
| ENSG00000222365 | SNORD12B   | 30.08387554 | -0.897099623     | 0.017135435 |
| ENSG00000129354 | AP1M2      | 127.7561617 | -0.892311049     | 0.008597878 |
| ENSG00000165125 | TRPV6      | 10.54192128 | -0.88342858      | 0.020472731 |
| ENSG00000126838 | PZP        | 95.24037637 | -0.882973701     | 0.005686007 |
| ENSG00000279164 | AL118508.3 | 22.69716711 | -0.882922222     | 0.014678447 |
| ENSG00000249160 | LINC02213  | 11.55395099 | -0.880575367     | 0.008690999 |

|                 |            |             |              |             |
|-----------------|------------|-------------|--------------|-------------|
| ENSG00000181800 | CELF2-AS1  | 223.2131479 | -0.872927033 | 0.037787253 |
| ENSG00000215267 | AKR1C7P    | 13.18642218 | -0.865808458 | 0.014427485 |
| ENSG00000130202 | NECTIN2    | 657.164553  | -0.859157295 | 0.046656204 |
| ENSG00000201441 | RNU6-646P  | 10.10845814 | -0.850497691 | 0.020685857 |
| ENSG00000235674 | LDHAP2     | 7.753085767 | -0.848020035 | 0.024295224 |
| ENSG00000066279 | ASPM       | 38.17216033 | -0.844703359 | 0.008707791 |
| ENSG00000054356 | PTPRN      | 55.88026765 | -0.843607938 | 0.011024729 |
| ENSG00000144290 | SLC4A10    | 527.9786937 | -0.839866613 | 0.023864516 |
| ENSG00000278896 | AC025031.5 | 11.99146906 | -0.839821297 | 0.027133095 |
| ENSG00000085491 | SLC25A24   | 22.72927165 | -0.83862035  | 0.024591298 |
| ENSG00000254165 | AC090739.1 | 15.1906757  | -0.831775559 | 0.026226826 |
| ENSG00000248516 | AC105415.1 | 12.61407398 | -0.827159868 | 0.041084443 |
| ENSG00000255874 | LINC00346  | 16.82886547 | -0.821251415 | 0.013841437 |
| ENSG00000211663 | IGLV3-19   | 548.3400262 | -0.81223737  | 0.032870115 |
| ENSG00000274290 | HIST1H2BE  | 46.83980578 | -0.810754207 | 0.013197572 |
| ENSG00000278661 | TRAJ37     | 7.975953214 | -0.810627829 | 0.030591223 |
| ENSG00000259268 | AC007950.1 | 8.371893599 | -0.808985788 | 0.028587001 |
| ENSG00000249601 | LINC01187  | 13.1856974  | -0.806951322 | 0.030195762 |
| ENSG00000280161 | AC022413.1 | 11.59745789 | -0.806524961 | 0.007575248 |
| ENSG00000239264 | TXNDC5     | 20.89038393 | -0.802739135 | 0.01170512  |
| ENSG00000251441 | RTEL1P1    | 33.23271758 | -0.787557656 | 0.027316327 |
| ENSG00000214659 | KRT8P26    | 18.55693272 | -0.785975502 | 0.008351184 |
| ENSG00000269877 | AC008753.3 | 10.74305132 | -0.784048254 | 0.033171775 |
| ENSG00000226306 | NPY6R      | 10.53694414 | -0.780917131 | 0.023148023 |
| ENSG00000241644 | INMT       | 9.702872313 | -0.78091526  | 0.011798106 |
| ENSG00000233077 | LINC01271  | 41.34311002 | -0.778729865 | 0.002700855 |
| ENSG00000248905 | FMN1       | 31.57539786 | -0.776300979 | 0.045018636 |
| ENSG00000279078 | SND1-IT1   | 32.52383848 | -0.776245993 | 0.014842155 |
| ENSG00000228113 | AC003991.1 | 41.92879544 | -0.775937792 | 0.026047624 |
| ENSG00000269924 | AC024451.4 | 18.14901796 | -0.775619837 | 0.000123394 |
| ENSG00000184260 | HIST2H2AC  | 52.77260846 | -0.7755898   | 0.01748493  |
| ENSG00000142621 | FHAD1      | 28.29687501 | -0.774184907 | 0.004674706 |
| ENSG00000250644 | AC068580.4 | 23.34697302 | -0.769090954 | 0.019031712 |
| ENSG00000225402 | AC010878.1 | 54.59625115 | -0.749508679 | 0.020260236 |
| ENSG00000278002 | AL627171.1 | 10.4641824  | -0.745146393 | 0.045767275 |
| ENSG00000277224 | HIST1H2BF  | 35.04779237 | -0.744799718 | 0.010637132 |
| ENSG00000245105 | A2M-AS1    | 52.88753702 | -0.741064856 | 0.009279026 |
| ENSG00000248265 | FLJ12825   | 14.05629251 | -0.73471943  | 0.023385384 |
| ENSG00000266980 | AC087289.1 | 17.59879025 | -0.733017479 | 0.002329955 |
| ENSG00000274419 | TBC1D3D    | 35.39211051 | -0.727573261 | 0.00871732  |
| ENSG00000157554 | ERG        | 27.46850775 | -0.725309391 | 0.017982913 |
| ENSG00000260070 | AC006960.3 | 26.14075757 | -0.724598691 | 0.012193562 |
| ENSG00000177173 | NAP1L4P1   | 15.23637347 | -0.723903694 | 0.034346049 |
| ENSG00000166435 | XRRA1      | 344.480251  | -0.720029464 | 0.001854359 |
| ENSG00000228329 | LINC01890  | 11.10337393 | -0.718180895 | 0.008344549 |
| ENSG00000078399 | HOXA9      | 22.73336921 | -0.714460737 | 0.002484658 |
| ENSG00000008056 | SYN1       | 20.81239193 | -0.714410999 | 0.021561574 |

|                 |            |             |              |             |
|-----------------|------------|-------------|--------------|-------------|
| ENSG00000170955 | CAVIN3     | 55.3065677  | -0.712646171 | 0.024318516 |
| ENSG00000112984 | KIF20A     | 23.53460803 | -0.709223691 | 0.014784357 |
| ENSG00000165626 | BEND7      | 156.2395911 | -0.706758963 | 0.003163025 |
| ENSG00000170231 | FABP6      | 45.13020708 | -0.702693479 | 0.019867969 |
| ENSG00000218357 | LINC01644  | 30.59709269 | -0.702451132 | 0.021595273 |
| ENSG00000224863 | LINC01398  | 14.95388757 | -0.700161489 | 0.026467609 |
| ENSG00000188487 | INSC       | 37.60658754 | -0.698107883 | 0.016838204 |
| ENSG00000258824 | AL122035.1 | 20.72131532 | -0.694416115 | 0.011532048 |
| ENSG00000257335 | MGAM       | 1735.032491 | -0.692908044 | 0.036214467 |
| ENSG00000274423 | AC242843.1 | 39.02004355 | -0.686808494 | 0.02024559  |
| ENSG00000134058 | CDK7       | 45.03450652 | -0.684488657 | 0.006240362 |
| ENSG00000228915 | OR7E128P   | 10.39116124 | -0.683634702 | 0.044524903 |
| ENSG00000227339 | THRAP3P1   | 8.624060417 | -0.683471642 | 0.049736341 |
| ENSG00000229000 | SEPT7P8    | 12.30658104 | -0.681893769 | 0.020242208 |
| ENSG00000235962 | RPL7AP53   | 13.21174472 | -0.680452811 | 0.034054246 |
| ENSG00000267934 | AC010300.1 | 29.98364042 | -0.679997981 | 0.00525028  |
| ENSG00000230006 | ANKRD36BP2 | 146.2240705 | -0.679095303 | 0.029236466 |
| ENSG00000260808 | AP003096.1 | 9.316396373 | -0.675534283 | 0.021471705 |
| ENSG00000151789 | ZNF385D    | 25.17511841 | -0.67041276  | 0.03698415  |
| ENSG00000234617 | SNRK-AS1   | 14.35240746 | -0.670015901 | 0.019031837 |
| ENSG00000228906 | AL353804.1 | 20.82526854 | -0.669870498 | 0.014651258 |
| ENSG00000206754 | SNORD101   | 8.750715198 | -0.668475314 | 0.033012869 |
| ENSG00000137801 | THBS1      | 819.7125383 | -0.666371098 | 0.02653471  |
| ENSG00000277157 | HIST1H4D   | 31.43949516 | -0.663781314 | 0.045940919 |
| ENSG00000138079 | SLC3A1     | 15.45378138 | -0.659121467 | 0.018954839 |
| ENSG00000170312 | CDK1       | 38.32390467 | -0.658178701 | 0.005460582 |
| ENSG00000226393 | IFNA20P    | 16.64947059 | -0.656075204 | 0.024029189 |
| ENSG00000279803 | AC009090.5 | 8.175806325 | -0.653028819 | 0.029346277 |
| ENSG00000230069 | LRR37A15P  | 74.97950739 | -0.645360639 | 0.013605175 |
| ENSG00000182253 | SYNM       | 130.1475015 | -0.644506348 | 0.016215016 |
| ENSG00000124657 | OR2B6      | 33.59561678 | -0.642766648 | 0.03936062  |
| ENSG00000123485 | HJURP      | 37.75952903 | -0.641909302 | 0.012846372 |
| ENSG00000148773 | MKI67      | 336.4902135 | -0.639516679 | 0.002121301 |
| ENSG00000180138 | CSNK1A1L   | 50.388092   | -0.637219288 | 0.021121734 |
| ENSG00000214700 | C12orf71   | 11.24025726 | -0.636855218 | 0.016696852 |
| ENSG00000216657 | GLRX3P2    | 9.622469791 | -0.635174767 | 0.026409477 |
| ENSG00000131747 | TOP2A      | 151.7218058 | -0.633944366 | 0.002249054 |
| ENSG00000198580 | AC073343.1 | 11.65107209 | -0.633725889 | 0.038519772 |
| ENSG00000253328 | SUMO2P19   | 119.4843124 | -0.632733337 | 0.012923539 |
| ENSG00000253919 | THAP12P7   | 28.28814271 | -0.629884111 | 0.005203531 |
| ENSG00000259351 | AC015914.1 | 30.50583309 | -0.628684554 | 0.024989558 |
| ENSG00000205038 | PKHD1L1    | 43.50991477 | -0.628649219 | 0.004585447 |
| ENSG00000232702 | AL158050.1 | 15.17659278 | -0.628446559 | 0.014289567 |
| ENSG00000229419 | RALGAPA1P1 | 63.79225196 | -0.626628603 | 7.15E-05    |
| ENSG00000258439 | AC007956.1 | 21.30079211 | -0.624804732 | 0.011585224 |
| ENSG00000266651 | AC093484.5 | 9.30365843  | -0.624757163 | 0.023047902 |
| ENSG00000112584 | FAM120B    | 73.01777169 | -0.622484182 | 0.035648418 |

|                 |            |             |              |             |
|-----------------|------------|-------------|--------------|-------------|
| ENSG00000224216 | AC234781.1 | 10.77710285 | -0.617758058 | 0.032630214 |
| ENSG00000074527 | NTN4       | 39.69849822 | -0.616578788 | 0.03037132  |
| ENSG00000123689 | GOS2       | 91.19184709 | -0.614329082 | 0.042398293 |
| ENSG00000182397 | DNM1P46    | 11.35764864 | -0.612448742 | 0.042563992 |
| ENSG00000237877 | LINC01473  | 10.00505563 | -0.610285613 | 0.047025962 |
| ENSG00000253981 | ALG1L13P   | 126.1550012 | -0.607109013 | 0.001165412 |
| ENSG00000171848 | RRM2       | 100.2364082 | -0.601202233 | 0.015485723 |
| ENSG00000239998 | LILRA2     | 665.4070908 | -0.601116357 | 0.040902533 |
| ENSG00000261229 | AC021483.2 | 12.55456912 | -0.60070232  | 0.018639745 |
| ENSG00000189238 | LINC00943  | 58.01327854 | -0.599179141 | 0.034984605 |
| ENSG00000223886 | AC073073.1 | 20.5569901  | -0.598396717 | 0.002644009 |
| ENSG00000272102 | AL133406.3 | 10.75582936 | -0.596433494 | 0.024511877 |
| ENSG00000111058 | ACSS3      | 69.33039833 | -0.593817013 | 0.013439051 |
| ENSG00000086289 | EPDR1      | 34.40718219 | -0.593359483 | 0.03230668  |
| ENSG00000259703 | LINC00593  | 42.00703887 | -0.592851983 | 0.033101131 |
| ENSG00000230280 | HNRNPA1P59 | 49.0855857  | -0.591331816 | 0.025486147 |
| ENSG00000242154 | AC004884.2 | 13.27781578 | -0.589117543 | 0.041627593 |
| ENSG00000231826 | LINC01819  | 49.68960255 | -0.588262538 | 0.008086643 |
| ENSG00000160224 | AIRE       | 183.9364779 | -0.586447534 | 0.046524373 |
| ENSG00000105996 | HOXA2      | 26.78092346 | -0.585896769 | 0.038728721 |
| ENSG00000171617 | ENC1       | 1101.63082  | -0.583259317 | 0.003323269 |
| ENSG00000071282 | LMCD1      | 17.77646435 | -0.582729988 | 0.027698838 |
| ENSG00000240135 | AC114876.1 | 9.837413382 | -0.581202823 | 0.028478192 |
| ENSG00000260660 | AC113208.3 | 119.2382523 | -0.579924969 | 0.028482846 |
| ENSG00000246203 | AL353807.3 | 111.8597995 | -0.577463666 | 0.043340124 |
| ENSG00000255733 | IFNG-AS1   | 50.84204439 | -0.575952381 | 0.039270145 |
| ENSG00000178075 | GRAMD1C    | 629.7884133 | -0.573167731 | 0.020563621 |
| ENSG00000238160 | AC116366.2 | 825.4232714 | -0.571701556 | 0.007762958 |
| ENSG00000158023 | WDR66      | 40.71068152 | -0.570455195 | 0.003856703 |
| ENSG00000157456 | CCNB2      | 57.55594544 | -0.570006681 | 0.016171092 |
| ENSG00000251161 | AC020661.1 | 18.42065406 | -0.56879258  | 0.016123531 |
| ENSG00000129173 | E2F8       | 15.21034568 | -0.568509851 | 0.049520165 |
| ENSG00000186185 | KIF18B     | 28.61145664 | -0.564047068 | 0.027731425 |
| ENSG00000124875 | CXCL6      | 44.50567005 | -0.561981457 | 0.044865169 |
| ENSG00000254750 | CASP1P2    | 90.63530022 | -0.560953735 | 0.013905843 |
| ENSG00000162630 | B3GALT2    | 101.045348  | -0.560564186 | 0.043895051 |
| ENSG00000248544 | AC008676.1 | 35.06569769 | -0.560038658 | 0.008664769 |
| ENSG00000273249 | BX649632.1 | 12.72168893 | -0.559181115 | 0.049065769 |
| ENSG00000161040 | FBXL13     | 184.6942133 | -0.558337403 | 0.008345069 |
| ENSG00000118402 | ELOVL4     | 86.95540827 | -0.557528068 | 0.021680718 |
| ENSG00000272084 | AL137127.1 | 60.95736006 | -0.554626011 | 0.026687562 |
| ENSG00000267544 | AC007229.1 | 15.31743656 | -0.554004542 | 0.016563813 |
| ENSG00000272902 | TBC1D8-AS1 | 15.8222423  | -0.55061432  | 0.036356287 |
| ENSG00000248971 | KRT8P46    | 53.83935991 | -0.545851647 | 0.030785197 |
| ENSG00000148848 | ADAM12     | 109.9493351 | -0.545467317 | 0.038671504 |
| ENSG00000180769 | WDFY3-AS2  | 35.33890355 | -0.545065121 | 0.027414102 |
| ENSG00000238005 | AL391832.2 | 185.7177152 | -0.54285759  | 0.014925117 |

|                 |            |             |              |             |
|-----------------|------------|-------------|--------------|-------------|
| ENSG00000051341 | POLQ       | 34.3440421  | -0.542029293 | 0.033506454 |
| ENSG00000238098 | ABCA17P    | 21.50443753 | -0.537946556 | 0.032210467 |
| ENSG00000232713 | AC010733.1 | 36.31587612 | -0.536389413 | 0.016326027 |
| ENSG00000211459 | MT-RNR1    | 101674.1977 | -0.536221384 | 0.008293541 |
| ENSG00000123473 | STIL       | 78.59313795 | -0.533779721 | 0.011829184 |
| ENSG00000272839 | AC011899.3 | 72.24875512 | -0.53358593  | 0.041607141 |
| ENSG00000137261 | KIAA0319   | 366.5220501 | -0.532411456 | 0.032086219 |
| ENSG00000275367 | AC092111.1 | 30.75307312 | -0.528856446 | 0.031441563 |
| ENSG00000092853 | CLSPN      | 37.78467387 | -0.528694162 | 0.011274524 |
| ENSG00000259144 | RANBP20P   | 51.50439734 | -0.526426995 | 0.026990057 |
| ENSG00000279386 | AC021106.3 | 57.49752636 | -0.523768278 | 0.029490036 |
| ENSG00000280173 | AC104447.1 | 102.1419255 | -0.52172017  | 0.000977414 |
| ENSG00000122861 | PLAU       | 55.77957754 | -0.519349414 | 0.043822029 |
| ENSG00000224596 | ZMIZ1-AS1  | 37.20484717 | -0.516892192 | 0.029262058 |
| ENSG00000133026 | MYH10      | 208.3090964 | -0.514352106 | 0.010952041 |
| ENSG00000269028 | MTRNR2L12  | 28.28741771 | -0.507295591 | 0.036095036 |
| ENSG00000253320 | AZIN1-AS1  | 23.28742708 | -0.505405886 | 0.031423769 |
| ENSG00000280159 | AC016583.1 | 42.6416103  | -0.50358937  | 0.021639108 |
| ENSG00000163701 | IL17RE     | 103.8411266 | -0.502688995 | 0.039301463 |
| ENSG00000092200 | RPGRIP1    | 747.6283749 | -0.502515394 | 0.004420706 |
| ENSG00000172771 | EFCAB12    | 233.7422815 | -0.496116303 | 0.02683683  |
| ENSG00000094804 | CDC6       | 55.21203569 | -0.495627289 | 0.012195744 |
| ENSG00000181350 | LRRC75A    | 531.4109362 | -0.495071266 | 0.01085364  |
| ENSG00000180316 | PNPLA1     | 274.6972446 | -0.491031528 | 0.00484434  |
| ENSG00000234614 | AL450992.2 | 125.9582143 | -0.489760365 | 0.009487639 |
| ENSG00000188219 | POTEE      | 9.648677876 | -0.48778363  | 0.016177943 |
| ENSG00000242324 | AL049634.1 | 74.8703975  | -0.487663525 | 0.005368018 |
| ENSG00000249863 | AC021106.1 | 153.9410198 | -0.48543855  | 0.030411418 |
| ENSG00000248734 | AC008906.1 | 72.83825205 | -0.485321032 | 0.039101404 |
| ENSG00000005249 | PRKAR2B    | 335.3366309 | -0.483438846 | 0.049983916 |
| ENSG00000212916 | MAP10      | 101.6917685 | -0.481971602 | 0.018524677 |
| ENSG00000184451 | CCR10      | 52.8480364  | -0.480920031 | 0.022766228 |
| ENSG00000133800 | LYVE1      | 74.1593036  | -0.478672916 | 0.033171891 |
| ENSG00000250492 | INTS6P1    | 22.50327653 | -0.476994743 | 0.047213321 |
| ENSG00000121152 | NCAPH      | 74.75809065 | -0.473802161 | 0.015879689 |
| ENSG00000062524 | LTK        | 1316.131415 | -0.473461555 | 0.044939782 |
| ENSG00000227354 | RBM26-AS1  | 47.8118183  | -0.473141519 | 0.037414026 |
| ENSG00000070371 | CLTCL1     | 559.6119616 | -0.470620662 | 0.004383456 |
| ENSG00000166359 | WDR88      | 60.6062664  | -0.46884134  | 0.027833896 |
| ENSG00000163739 | CXCL1      | 444.6454602 | -0.465798978 | 0.012986962 |
| ENSG00000262655 | SPON1      | 140.7582259 | -0.465278467 | 0.025831515 |
| ENSG00000196549 | MME        | 18188.52207 | -0.464496949 | 0.026481635 |
| ENSG00000175773 | APO02986.1 | 26.37158081 | -0.464342173 | 0.021620094 |
| ENSG00000175711 | B3GNTL1    | 421.2789311 | -0.463617162 | 0.007366478 |
| ENSG00000165115 | KIF27      | 309.0709733 | -0.462322803 | 0.030675794 |
| ENSG00000171595 | DNAI2      | 46.26100208 | -0.460307449 | 0.00829202  |
| ENSG00000269564 | AC008753.2 | 23.05719975 | -0.457701079 | 0.04521703  |

|                 |            |             |              |             |
|-----------------|------------|-------------|--------------|-------------|
| ENSG00000228623 | ZNF883     | 40.18358929 | -0.456528473 | 0.019053311 |
| ENSG00000232742 | RHOQP2     | 30.82562462 | -0.456387771 | 0.023777081 |
| ENSG00000186642 | PDE2A      | 85.02942931 | -0.456386587 | 0.002172019 |
| ENSG00000089505 | CMTM1      | 216.8478734 | -0.453036604 | 0.027263573 |
| ENSG00000058866 | DGKG       | 563.4756673 | -0.452608154 | 0.000418717 |
| ENSG00000173585 | CCR9       | 155.682911  | -0.452547437 | 0.03929486  |
| ENSG00000177570 | SAMD12     | 91.73888599 | -0.445148573 | 0.035973257 |
| ENSG00000086570 | FAT2       | 42.79055897 | -0.444745277 | 0.026114138 |
| ENSG00000087303 | NID2       | 28.89594903 | -0.44466578  | 0.029562395 |
| ENSG00000214688 | C10orf105  | 520.48949   | -0.443940743 | 0.017021093 |
| ENSG00000183690 | EFHC2      | 208.0974243 | -0.44206455  | 0.045177498 |
| ENSG00000157985 | AGAP1      | 262.758785  | -0.439763107 | 0.034507715 |
| ENSG00000203819 | HIST2H2BC  | 42.45577517 | -0.436668763 | 0.045785209 |
| ENSG00000226121 | AC009487.2 | 390.1412256 | -0.434338746 | 0.023255255 |
| ENSG00000189233 | NUGGC      | 141.0616271 | -0.431396614 | 0.033468295 |
| ENSG00000172748 | ZNF596     | 116.2745881 | -0.430852302 | 0.026087969 |
| ENSG00000187699 | C2orf88    | 707.6463598 | -0.430537002 | 0.02893861  |
| ENSG00000112782 | CLIC5      | 213.3386089 | -0.429789556 | 0.014684683 |
| ENSG00000228382 | ITPKB-IT1  | 176.0756672 | -0.429045439 | 0.040954299 |
| ENSG00000259248 | USP3-AS1   | 71.2730581  | -0.427650148 | 0.025849693 |
| ENSG00000155749 | ALS2CR12   | 103.0111389 | -0.426072467 | 0.022051721 |
| ENSG00000179299 | NSUN7      | 475.2022511 | -0.423802514 | 0.044753021 |
| ENSG00000183044 | ABAT       | 1979.425142 | -0.423542717 | 0.003014628 |
| ENSG00000072422 | RHOBTB1    | 120.5124464 | -0.423064149 | 0.034798433 |
| ENSG00000234337 | AC026462.1 | 39.91897513 | -0.422058469 | 0.00535302  |
| ENSG00000100024 | UPB1       | 214.5670352 | -0.421719732 | 0.010963431 |
| ENSG00000203876 | ADD3-AS1   | 39.13870918 | -0.42151147  | 0.012660737 |
| ENSG00000212283 | SNORD89    | 81.30807961 | -0.421083699 | 0.033299362 |
| ENSG00000243960 | AL390195.1 | 20.76757128 | -0.420765516 | 0.039666111 |
| ENSG00000266601 | AC018521.6 | 37.17498647 | -0.420096702 | 0.008551051 |
| ENSG00000258082 | AL391832.3 | 68.20100065 | -0.41703932  | 0.033277898 |
| ENSG00000072952 | MRVI1      | 5126.080896 | -0.415632551 | 0.02689382  |
| ENSG00000174028 | FAM3C2     | 65.10096817 | -0.415297701 | 0.048378984 |
| ENSG00000244486 | SCARF2     | 152.2271137 | -0.415057057 | 0.020141028 |
| ENSG00000004660 | CAMKK1     | 2081.315591 | -0.414909646 | 0.007816881 |
| ENSG00000278311 | GGNBP2     | 147.2471151 | -0.414397519 | 0.01858164  |
| ENSG00000135083 | CCNJL      | 4160.029726 | -0.413426201 | 0.031574123 |
| ENSG00000187695 | AC112484.1 | 125.0360655 | -0.413259759 | 0.038880619 |
| ENSG00000205890 | AC108134.1 | 477.1190936 | -0.412047223 | 0.047899065 |
| ENSG00000278231 | AL133342.1 | 113.3713341 | -0.411439414 | 0.036569773 |
| ENSG00000257226 | AC079584.2 | 30.04287716 | -0.409271009 | 0.049604851 |
| ENSG00000233609 | RPL10P19   | 151.4883775 | -0.408782759 | 0.016165624 |
| ENSG00000164953 | TMEM67     | 76.68350988 | -0.408411188 | 0.044284235 |
| ENSG00000103512 | NOMO1      | 151.8546611 | -0.406483215 | 0.027915096 |
| ENSG00000232952 | AL512844.1 | 34.01577225 | -0.404423083 | 0.035727055 |
| ENSG00000280953 | LINC01163  | 83.38321967 | -0.404098741 | 0.025860924 |
| ENSG00000215529 | EFCAB8     | 95.9949931  | -0.402433801 | 0.023882851 |

|                 |             |             |              |             |
|-----------------|-------------|-------------|--------------|-------------|
| ENSG00000246263 | UBR5-AS1    | 1236.045617 | -0.401124068 | 0.032341151 |
| ENSG00000233369 | GTF2IP4     | 2186.795713 | -0.400885432 | 0.003406042 |
| ENSG00000249476 | AC008467.1  | 310.3199348 | -0.398915824 | 0.020118135 |
| ENSG00000134571 | MYBPC3      | 893.4193394 | -0.398510848 | 0.033527091 |
| ENSG00000075218 | GTSE1       | 49.45114019 | -0.397909938 | 0.045747247 |
| ENSG00000132405 | TBC1D14     | 3380.502632 | -0.397266097 | 0.024082769 |
| ENSG00000108932 | SLC16A6     | 1152.500974 | -0.397078064 | 0.012155411 |
| ENSG00000236345 | AL354719.2  | 230.4390018 | -0.395692346 | 0.030504692 |
| ENSG00000133808 | MICALCL     | 279.1467198 | -0.393270071 | 0.048416967 |
| ENSG00000210082 | MT-RNR2     | 289812.3275 | -0.392861586 | 0.022780148 |
| ENSG00000223750 | SIRPB3P     | 39.88830774 | -0.389802879 | 0.036485726 |
| ENSG00000076356 | PLXNA2      | 413.4635707 | -0.388349125 | 0.02399458  |
| ENSG00000169679 | BUB1        | 112.8121238 | -0.387833885 | 0.046902396 |
| ENSG00000188107 | EYS         | 86.46217065 | -0.38678374  | 0.024851468 |
| ENSG00000155657 | TTN         | 1767.125207 | -0.386684042 | 0.034585844 |
| ENSG00000262001 | DLGAP1-AS2  | 190.7403473 | -0.386612606 | 0.040342163 |
| ENSG00000119408 | NEK6        | 2088.474729 | -0.385788442 | 0.003746254 |
| ENSG00000138160 | KIF11       | 141.2836016 | -0.385208719 | 0.009900356 |
| ENSG00000119121 | TRPM6       | 1396.757952 | -0.383000461 | 0.039732839 |
| ENSG00000159228 | CBR1        | 1049.192822 | 0.381249761  | 0.009556258 |
| ENSG00000173991 | TCAP        | 224.7147618 | 0.382246802  | 0.037771677 |
| ENSG00000255559 | ZNF252P-AS1 | 45.79789416 | 0.382784628  | 0.029440156 |
| ENSG00000152207 | CYSLTR2     | 760.8115509 | 0.386349725  | 0.042730864 |
| ENSG00000174137 | FAM53A      | 69.61646071 | 0.386502957  | 0.020740774 |
| ENSG00000228427 | AL590764.1  | 184.1583508 | 0.386762335  | 0.001130832 |
| ENSG00000197933 | ZNF823      | 124.1244584 | 0.388764997  | 0.011214787 |
| ENSG00000127184 | COX7C       | 2524.970894 | 0.391158057  | 0.047809146 |
| ENSG00000238058 | AL355574.1  | 24.72289408 | 0.391181954  | 0.034604419 |
| ENSG00000251432 | AC108062.1  | 53.12185581 | 0.394165521  | 0.022551002 |
| ENSG00000180061 | TMEM150B    | 585.1196493 | 0.395588278  | 0.038883884 |
| ENSG00000123975 | CKS2        | 115.3569532 | 0.398735515  | 0.028724787 |
| ENSG00000099889 | ARVCF       | 297.1825104 | 0.399049086  | 0.03700055  |
| ENSG00000164258 | NDUFS4      | 245.5950919 | 0.400204411  | 0.047241401 |
| ENSG00000164512 | ANKRD55     | 449.1936183 | 0.40023061   | 0.030444077 |
| ENSG00000278126 | AC139768.1  | 54.15106574 | 0.400301993  | 0.01499029  |
| ENSG00000005187 | ACSM3       | 307.7973719 | 0.400781871  | 0.007388518 |
| ENSG00000238000 | AC116347.1  | 94.48434612 | 0.401174992  | 0.040950683 |
| ENSG00000261222 | AC064805.1  | 953.0834996 | 0.402440208  | 0.047167156 |
| ENSG00000004838 | ZMYND10     | 173.1957785 | 0.404314159  | 0.015969036 |
| ENSG00000257702 | LBX2-AS1    | 131.9482024 | 0.405416491  | 0.016498503 |
| ENSG00000184221 | OLIG1       | 1241.902385 | 0.406937569  | 0.016791924 |
| ENSG00000234648 | AL162151.2  | 220.4903335 | 0.409505995  | 0.040985494 |
| ENSG00000162373 | BEND5       | 123.194778  | 0.410300375  | 0.031030937 |
| ENSG00000175591 | P2RY2       | 408.1361869 | 0.410707156  | 0.002180877 |
| ENSG00000138606 | SHF         | 58.33816639 | 0.413361785  | 0.020178555 |
| ENSG00000155363 | MOV10       | 4304.899879 | 0.413547862  | 0.031302669 |
| ENSG00000198417 | MT1F        | 266.721998  | 0.421656773  | 0.014691673 |

|                 |            |             |             |              |
|-----------------|------------|-------------|-------------|--------------|
| ENSG00000113504 | SLC12A7    | 903.9807731 | 0.424030518 | 0.033587059  |
| ENSG00000243199 | AC115223.1 | 198.6298549 | 0.424105695 | 0.00225653   |
| ENSG00000115657 | ABCB6      | 32.25176822 | 0.424543873 | 0.016168803  |
| ENSG00000278607 | AC015819.2 | 27.35602101 | 0.42470527  | 0.042921684  |
| ENSG00000059915 | PSD        | 222.2871179 | 0.42814874  | 0.038375184  |
| ENSG00000144485 | HES6       | 127.0292647 | 0.428710171 | 0.032854204  |
| ENSG00000165457 | FOLR2      | 290.7346421 | 0.429531344 | 0.014641631  |
| ENSG00000243824 | RPL12P6    | 30.22286627 | 0.431106898 | 0.027967432  |
| ENSG00000178685 | PARP10     | 12257.06533 | 0.431410064 | 0.009866146  |
| ENSG00000168961 | LGALS9     | 14270.15765 | 0.432382077 | 0.025996496  |
| ENSG00000279332 | AC090772.4 | 46.85201125 | 0.434988592 | 0.049579471  |
| ENSG00000238103 | RPL9P7     | 96.90753966 | 0.438286493 | 0.04980992   |
| ENSG00000272343 | AC107952.2 | 41.72705354 | 0.439615318 | 0.029391022  |
| ENSG00000031691 | CENPQ      | 87.23127557 | 0.439939263 | 0.041706737  |
| ENSG00000140464 | PML        | 6620.632666 | 0.440306749 | 0.04979526   |
| ENSG00000173926 | 3-Mar      | 246.76655   | 0.442162532 | 0.0144440409 |
| ENSG00000171860 | C3AR1      | 2454.252711 | 0.443298209 | 0.04255644   |
| ENSG00000236383 | LINC00854  | 185.3827474 | 0.444273449 | 0.011983368  |
| ENSG00000179965 | ZNF771     | 57.75725784 | 0.444540645 | 0.026805666  |
| ENSG00000226525 | RPS7P10    | 105.6398625 | 0.444753781 | 0.045372927  |
| ENSG00000118162 | KPTN       | 492.6961393 | 0.449033345 | 0.020756964  |
| ENSG00000146677 | AC004453.1 | 181.7355631 | 0.449406664 | 0.036101038  |
| ENSG00000217716 | RPS10P3    | 112.0914774 | 0.449775667 | 0.030270158  |
| ENSG00000179921 | GPBAR1     | 2128.791955 | 0.455685218 | 0.012534017  |
| ENSG00000253865 | AC131025.1 | 22.85036969 | 0.45577843  | 0.042063906  |
| ENSG00000180340 | FZD2       | 311.5864948 | 0.464082374 | 0.015689086  |
| ENSG00000260401 | AP002761.4 | 702.2044627 | 0.465286129 | 0.003183362  |
| ENSG00000272644 | AC097468.3 | 47.41739229 | 0.471834918 | 0.040939281  |
| ENSG00000180917 | CMTR2      | 89.73836417 | 0.474873787 | 0.018625444  |
| ENSG00000260807 | AC009041.2 | 751.3230361 | 0.477054087 | 0.049295467  |
| ENSG00000185614 | FAM212A    | 172.1484118 | 0.485988359 | 0.012783472  |
| ENSG00000188282 | RUFY4      | 202.0784285 | 0.48626754  | 0.036815091  |
| ENSG00000282851 | BISPR      | 769.256151  | 0.486908408 | 0.016314333  |
| ENSG00000114315 | HES1       | 101.3393146 | 0.493025209 | 0.033304407  |
| ENSG00000267390 | AC036176.1 | 36.55940347 | 0.496687381 | 0.027729379  |
| ENSG00000059378 | PARP12     | 7179.436122 | 0.49699015  | 0.031790561  |
| ENSG00000103319 | EEF2K      | 42.03433474 | 0.497217515 | 0.019244454  |
| ENSG00000175287 | PHYHD1     | 41.84692704 | 0.49738263  | 0.034908928  |
| ENSG00000268510 | IFNL3P1    | 20.55495017 | 0.498847594 | 0.045886391  |
| ENSG00000261061 | AC092718.4 | 35.95079076 | 0.499644035 | 0.031650924  |
| ENSG00000134809 | TIMM10     | 663.1060129 | 0.503263707 | 0.020807426  |
| ENSG00000233223 | AC016876.1 | 132.7388245 | 0.506388545 | 0.002243801  |
| ENSG00000152942 | RAD17      | 129.7838502 | 0.508245564 | 0.022151808  |
| ENSG00000246560 | AC018797.2 | 29.16463731 | 0.508885093 | 0.017121474  |
| ENSG00000247934 | AC022364.1 | 24.96784327 | 0.509238806 | 0.019090394  |
| ENSG00000160223 | ICOSLG     | 214.8866016 | 0.509952281 | 0.034337162  |
| ENSG00000123685 | BATF3      | 163.9052    | 0.511224071 | 0.018009687  |



|                 |             |             |             |             |
|-----------------|-------------|-------------|-------------|-------------|
| ENSG00000272988 | AC022392.1  | 20.21218733 | 0.514431828 | 0.049989286 |
| ENSG00000166016 | ABTB2       | 363.3889741 | 0.515073892 | 0.009240744 |
| ENSG00000197816 | CCDC180     | 141.933184  | 0.515821708 | 0.001248627 |
| ENSG00000278974 | AC093909.6  | 94.31340989 | 0.521379531 | 0.008312849 |
| ENSG00000119632 | IFI27L2     | 30.89923806 | 0.522070483 | 0.035855699 |
| ENSG00000003096 | KLHL13      | 29.25704251 | 0.524749293 | 0.042588616 |
| ENSG00000108771 | DHX58       | 3016.009727 | 0.525197395 | 0.033385886 |
| ENSG00000168528 | SERINC2     | 238.3210193 | 0.529944655 | 0.03755108  |
| ENSG00000111247 | RAD51AP1    | 33.22284556 | 0.530195531 | 0.046736286 |
| ENSG00000108679 | LGALS3BP    | 2413.572519 | 0.53192531  | 0.024150376 |
| ENSG00000272398 | CD24        | 1456.17268  | 0.532170758 | 0.002149096 |
| ENSG00000166743 | ACSM1       | 40.89666807 | 0.534178712 | 0.010381674 |
| ENSG00000225131 | PSME2P2     | 59.71014683 | 0.538882293 | 0.010880185 |
| ENSG00000224892 | RPS4XP16    | 115.3862516 | 0.539019851 | 0.008565948 |
| ENSG00000168026 | TTC21A      | 556.0243309 | 0.539560578 | 0.008995525 |
| ENSG00000189269 | DRICH1      | 58.29219709 | 0.544441109 | 0.044985387 |
| ENSG00000130303 | BST2        | 8252.21836  | 0.544506369 | 0.00639821  |
| ENSG00000182557 | SPNS3       | 800.1804141 | 0.546644553 | 0.000964815 |
| ENSG00000114942 | EEF1B2      | 174.3773564 | 0.546883352 | 0.007003525 |
| ENSG00000241657 | TRBV11-2    | 184.6747102 | 0.54729665  | 0.013496796 |
| ENSG00000162490 | DRAXIN      | 150.1915182 | 0.54833337  | 0.021406647 |
| ENSG00000103056 | SMPD3       | 1731.414463 | 0.551251201 | 0.00219971  |
| ENSG00000144395 | CCDC150     | 12.0511187  | 0.557493981 | 0.039085631 |
| ENSG00000270020 | AC009108.3  | 13.53040393 | 0.558719939 | 0.043608246 |
| ENSG00000092067 | CEBPE       | 752.1821727 | 0.560977339 | 0.007641124 |
| ENSG00000228106 | AL392172.1  | 38.13828701 | 0.563596421 | 0.017056138 |
| ENSG00000005513 | SOX8        | 123.8883171 | 0.565657027 | 0.01689351  |
| ENSG00000228203 | RNF144A-AS1 | 37.04718942 | 0.567838463 | 0.032564322 |
| ENSG00000139438 | FAM222A     | 19.91144917 | 0.56785586  | 0.04409245  |
| ENSG00000144642 | RBMS3       | 11.93869302 | 0.56932476  | 0.043570616 |
| ENSG00000269946 | AL158152.2  | 18.58197248 | 0.57021059  | 0.043204681 |
| ENSG00000279254 | AC020604.1  | 32.64179284 | 0.573299314 | 0.032665094 |
| ENSG00000279518 | AC083843.3  | 24.92810218 | 0.576975891 | 0.015722028 |
| ENSG00000223749 | MIR503HG    | 25.00380762 | 0.57969086  | 0.007433956 |
| ENSG00000282885 | AL627171.2  | 14.61074799 | 0.581419443 | 0.024835435 |
| ENSG00000272142 | AL359643.3  | 24.63982608 | 0.581903513 | 0.005012888 |
| ENSG00000274897 | PANO1       | 20.11925774 | 0.583214711 | 0.023584543 |
| ENSG00000256393 | AC138123.1  | 36.45710491 | 0.586347717 | 0.027322711 |
| ENSG00000247134 | AC090204.1  | 32.31318711 | 0.586793336 | 0.011621269 |
| ENSG00000021488 | SLC7A9      | 15.46383985 | 0.587835286 | 0.018752359 |
| ENSG00000243517 | AC024940.2  | 16.76576754 | 0.590012302 | 0.017695484 |
| ENSG00000272677 | AC124016.1  | 27.58004176 | 0.5926233   | 0.002127534 |
| ENSG00000149571 | KIRREL3     | 43.67216048 | 0.592751968 | 0.024349534 |
| ENSG00000272696 | AL359091.3  | 24.92221346 | 0.598281947 | 0.016040587 |
| ENSG00000234184 | LINC01781   | 51.72895685 | 0.6018095   | 0.016995463 |
| ENSG00000158747 | NBL1        | 40.17164295 | 0.602314323 | 0.040448167 |
| ENSG00000068079 | IFI35       | 4723.250619 | 0.60243708  | 0.027467181 |

|                 |            |             |             |             |
|-----------------|------------|-------------|-------------|-------------|
| ENSG00000238186 | AL603839.2 | 10.86800334 | 0.602834309 | 0.019245067 |
| ENSG00000132698 | RAB25      | 29.68864458 | 0.603865707 | 0.018482054 |
| ENSG00000130433 | CACNG6     | 226.189409  | 0.613345686 | 0.016294529 |
| ENSG00000237550 | RPL9P9     | 45.52358993 | 0.614675374 | 0.046152143 |
| ENSG00000278668 | AC005899.7 | 23.64855456 | 0.615022869 | 0.00195897  |
| ENSG00000259479 | SORD2P     | 78.75924893 | 0.61721033  | 0.031066913 |
| ENSG00000127743 | IL17B      | 22.5873432  | 0.618722049 | 0.012291807 |
| ENSG00000187690 | CXorf67    | 14.09648209 | 0.61900422  | 0.047888676 |
| ENSG00000234493 | RHOXF1P1   | 34.63215092 | 0.621124219 | 0.049277951 |
| ENSG00000167779 | IGFBP6     | 33.2114837  | 0.621258502 | 0.021789723 |
| ENSG00000198400 | NTRK1      | 65.70779907 | 0.624104043 | 0.010698564 |
| ENSG00000272010 | AC100814.1 | 18.34951673 | 0.62869637  | 0.02344404  |
| ENSG00000099957 | P2RX6      | 36.62324853 | 0.62976522  | 0.008980197 |
| ENSG00000091181 | IL5RA      | 958.7311957 | 0.63078683  | 0.017002446 |
| ENSG00000136315 | AL355922.1 | 48.56066212 | 0.632851297 | 0.042457295 |
| ENSG00000156194 | PPEF2      | 12.2105003  | 0.634349243 | 0.04376948  |
| ENSG00000104918 | RETN       | 438.9419301 | 0.636553647 | 0.044140806 |
| ENSG00000090104 | RGS1       | 47.0016444  | 0.638058007 | 0.032241773 |
| ENSG00000063660 | GPC1       | 44.89095784 | 0.640863078 | 0.001280388 |
| ENSG00000248677 | LINC02102  | 7.496682708 | 0.647411261 | 0.04431191  |
| ENSG00000131037 | EPS8L1     | 60.73730105 | 0.649234857 | 0.000167704 |
| ENSG00000020577 | SAMD4A     | 317.1227446 | 0.650035238 | 0.018510191 |
| ENSG00000266524 | GDF10      | 12.36849291 | 0.650925568 | 0.020440361 |
| ENSG00000169385 | RNASE2     | 1706.923205 | 0.652015693 | 0.013468075 |
| ENSG00000177685 | CRACR2B    | 278.4652812 | 0.653352956 | 0.001372941 |
| ENSG00000080166 | DCT        | 11.81273153 | 0.65416302  | 0.031682325 |
| ENSG00000142408 | CACNG8     | 199.3040132 | 0.656708431 | 0.003416365 |
| ENSG00000274191 | AC026333.4 | 10.84125758 | 0.658003769 | 0.034963334 |
| ENSG00000264281 | AC016596.1 | 72.05132032 | 0.658928862 | 0.004327695 |
| ENSG00000183134 | PTGDR2     | 1334.626949 | 0.660799493 | 0.003983844 |
| ENSG00000175643 | RMI2       | 152.4775795 | 0.66647727  | 0.018951509 |
| ENSG00000204619 | PPP1R11    | 102.0084759 | 0.674505459 | 0.039443813 |
| ENSG00000205531 | NAP1L4     | 632.3157857 | 0.67941589  | 0.000277163 |
| ENSG00000174837 | ADGRE1     | 3774.021533 | 0.682842318 | 8.35E-05    |
| ENSG00000260428 | SCX        | 30.24816809 | 0.686024318 | 0.004542651 |
| ENSG00000092068 | SLC7A8     | 156.9223678 | 0.686964291 | 0.04027009  |
| ENSG00000186715 | MST1L      | 59.12705648 | 0.691776988 | 0.004963577 |
| ENSG00000273240 | AC013468.1 | 14.08209366 | 0.695687264 | 0.010031211 |
| ENSG00000224635 | AL391095.1 | 39.87268788 | 0.697932353 | 0.016175255 |
| ENSG00000227527 | AC096540.1 | 11.55920934 | 0.699906258 | 0.008882366 |
| ENSG00000226155 | AC124944.1 | 11.17005023 | 0.702690471 | 0.038145952 |
| ENSG00000232346 | Z74021.1   | 56.07747265 | 0.703348087 | 0.0290494   |
| ENSG00000100376 | FAM118A    | 3687.731704 | 0.704431982 | 0.046290546 |
| ENSG00000131650 | KREMEN2    | 11.65347521 | 0.704770116 | 0.013731973 |
| ENSG00000128242 | GAL3ST1    | 8.193345293 | 0.704896256 | 0.036305625 |
| ENSG00000240509 | RPL34P18   | 28.33778755 | 0.70566175  | 0.025565148 |
| ENSG00000125148 | MT2A       | 1501.809374 | 0.707841345 | 0.014333335 |

|                 |            |             |             |             |
|-----------------|------------|-------------|-------------|-------------|
| ENSG00000134030 | CTIF       | 32.64817006 | 0.713396707 | 0.010096583 |
| ENSG00000128606 | LRRC17     | 15.34495503 | 0.71586992  | 0.010274692 |
| ENSG00000129757 | CDKN1C     | 23.83448905 | 0.716487312 | 0.03172611  |
| ENSG00000282933 | RHOXF1P3   | 16.57392812 | 0.722930526 | 0.028745865 |
| ENSG00000160180 | TFF3       | 34.66810954 | 0.724648738 | 0.04514458  |
| ENSG00000274373 | AC148476.1 | 30.12786778 | 0.728730337 | 0.018825712 |
| ENSG00000234456 | MAGI2-AS3  | 45.64885641 | 0.734487862 | 0.011077252 |
| ENSG00000128342 | LIF        | 16.16770112 | 0.736760694 | 0.032685979 |
| ENSG00000185338 | SOCS1      | 372.2902682 | 0.73840683  | 0.003580482 |
| ENSG00000172602 | RND1       | 14.13023054 | 0.739364503 | 0.040725    |
| ENSG00000125266 | EFNB2      | 15.02060807 | 0.742080701 | 0.006393703 |
| ENSG00000282608 | ADORA3     | 351.1440801 | 0.752370939 | 0.001470371 |
| ENSG00000134824 | FADS2      | 1166.345722 | 0.755905898 | 0.033594872 |
| ENSG00000250057 | AC114781.2 | 9.192215862 | 0.756650629 | 0.012374498 |
| ENSG00000123843 | C4BPB      | 14.53465481 | 0.756861512 | 0.039310739 |
| ENSG00000277511 | AC116407.2 | 79.03824164 | 0.759839517 | 0.012565817 |
| ENSG00000111335 | OAS2       | 13215.75606 | 0.764705763 | 0.028338967 |
| ENSG00000277491 | AC087392.5 | 13.4941909  | 0.767029666 | 0.034930801 |
| ENSG00000099377 | HSD3B7     | 98.23461712 | 0.768484788 | 0.000463765 |
| ENSG00000135114 | OASL       | 5472.777329 | 0.774261362 | 0.048133682 |
| ENSG00000255478 | AP000944.1 | 8.274527533 | 0.775266431 | 0.011673619 |
| ENSG00000234776 | C11orf94   | 8.349835937 | 0.781276429 | 0.013580916 |
| ENSG00000254017 | IGHEP2     | 13.74247626 | 0.790025525 | 0.04930902  |
| ENSG00000154099 | DNAAF1     | 13.62279352 | 0.790397858 | 0.002238826 |
| ENSG00000254648 | AP000911.3 | 7.154024321 | 0.795005225 | 0.02904278  |
| ENSG00000282850 | RHOXF1P2   | 16.89372056 | 0.796218596 | 0.034545354 |
| ENSG00000215148 | PRSS41     | 25.71688421 | 0.796371099 | 0.015219792 |
| ENSG00000233966 | UBE2SP1    | 8.661206302 | 0.798552834 | 0.044809954 |
| ENSG00000229605 | RPL21P93   | 10.12134956 | 0.805561771 | 0.005401795 |
| ENSG00000105366 | SIGLEC8    | 646.2224644 | 0.805897633 | 0.00483872  |
| ENSG00000161328 | LRRC56     | 35.33225336 | 0.807771409 | 0.042847639 |
| ENSG00000170486 | KRT72      | 679.1092697 | 0.809774555 | 0.042839964 |
| ENSG00000054179 | ENTPD2     | 126.2059909 | 0.817507974 | 0.04988964  |
| ENSG00000197728 | RPS26      | 11775.34263 | 0.820010135 | 0.019948271 |
| ENSG00000089127 | OAS1       | 9233.019636 | 0.820895271 | 0.026236242 |
| ENSG00000258811 | AL583810.2 | 15.59836919 | 0.823569114 | 0.016853339 |
| ENSG00000103355 | PRSS33     | 1094.696821 | 0.825450397 | 0.002612422 |
| ENSG00000112759 | SLC29A1    | 1598.201671 | 0.826786658 | 6.91E-05    |
| ENSG00000105205 | CLC        | 6791.854548 | 0.836444205 | 0.001108064 |
| ENSG00000228495 | LINC01013  | 22.96771622 | 0.837706222 | 0.0109838   |
| ENSG00000272733 | AP000345.2 | 30.09436267 | 0.842872471 | 0.005328833 |
| ENSG00000166592 | RRAD       | 12.00068527 | 0.849118817 | 0.019147228 |
| ENSG00000131773 | KHDRBS3    | 10.53868549 | 0.850470157 | 0.010917076 |
| ENSG00000275329 | AL138781.2 | 14.56328803 | 0.850497981 | 0.001810365 |
| ENSG00000168004 | HRASLS5    | 57.13463181 | 0.851973711 | 0.003618526 |
| ENSG00000196141 | SPATS2L    | 573.5661953 | 0.863012904 | 0.025563861 |
| ENSG00000188157 | AGRN       | 482.3955877 | 0.863972495 | 0.006109117 |

|                 |            |             |             |             |
|-----------------|------------|-------------|-------------|-------------|
| ENSG00000205927 | OLIG2      | 242.8736343 | 0.864977842 | 0.005066163 |
| ENSG00000111344 | RASAL1     | 16.09702061 | 0.873914552 | 0.014660057 |
| ENSG00000260081 | AF274858.3 | 24.03190843 | 0.883125513 | 6.03E-05    |
| ENSG00000148204 | CRB2       | 28.25214434 | 0.889011586 | 0.006769567 |
| ENSG00000204256 | BRD2       | 362.2848621 | 0.890170781 | 0.029099413 |
| ENSG00000204482 | LST1       | 11.07710969 | 0.896094985 | 0.046676636 |
| ENSG00000256826 | ATP5J2P4   | 10.27246034 | 0.897154318 | 0.032125226 |
| ENSG00000188290 | HES4       | 242.0346504 | 0.898370992 | 0.021671852 |
| ENSG00000160932 | LY6E       | 560.0061398 | 0.89839277  | 0.00349705  |
| ENSG00000212994 | RPS26P6    | 59.59767124 | 0.904692195 | 0.025777734 |
| ENSG00000196656 | AC004057.1 | 709.837289  | 0.908079533 | 0.012061839 |
| ENSG00000284690 | AC079325.2 | 1041.869197 | 0.908153536 | 0.007195576 |
| ENSG00000126709 | IFI6       | 10375.43157 | 0.919210541 | 0.03640824  |
| ENSG00000204209 | DAXX       | 40.85150158 | 0.926352151 | 0.020099702 |
| ENSG00000138755 | CXCL9      | 29.39701857 | 0.931444666 | 0.005008834 |
| ENSG00000182612 | TSPAN10    | 14.65255966 | 0.93385946  | 0.001285721 |
| ENSG00000178752 | ERFE       | 17.47000974 | 0.934338276 | 0.045410186 |
| ENSG00000254389 | RHPN1-AS1  | 8.624540615 | 0.947204616 | 0.000946719 |
| ENSG00000100628 | ASB2       | 20.83497025 | 0.953344551 | 0.00354131  |
| ENSG00000157368 | IL34       | 46.65101086 | 0.962509019 | 0.002641819 |
| ENSG00000223313 | RNU6-516P  | 12.32699112 | 0.963342814 | 0.00413446  |
| ENSG00000185507 | IRF7       | 488.4203743 | 0.99682651  | 0.000908531 |
| ENSG00000187608 | ISG15      | 8303.39895  | 1.032306459 | 0.02778545  |
| ENSG00000126467 | TSKS       | 80.51764382 | 1.037390644 | 0.005738677 |
| ENSG00000175356 | SCUBE2     | 10.42611782 | 1.044973175 | 0.011167053 |
| ENSG00000078081 | LAMP3      | 372.7131071 | 1.050332537 | 0.037080299 |
| ENSG00000133169 | BEX1       | 11.7465822  | 1.090279951 | 0.005301008 |
| ENSG00000275106 | AC025594.3 | 29.1824646  | 1.095296085 | 0.000390312 |
| ENSG00000247627 | MTND4P12   | 126.933877  | 1.096405255 | 0.019833181 |
| ENSG00000269720 | CCDC194    | 18.16413327 | 1.105136819 | 0.00276136  |
| ENSG00000137672 | TRPC6      | 37.81560906 | 1.110869346 | 0.004970791 |
| ENSG00000234745 | HLA-B      | 46932.00045 | 1.123710061 | 0.027510853 |
| ENSG00000225431 | LINC01671  | 8.876966827 | 1.155610712 | 0.002130021 |
| ENSG00000225964 | NRIR       | 157.7716771 | 1.164691577 | 0.011545949 |
| ENSG00000225071 | AC004552.1 | 12.53825696 | 1.179327409 | 0.020162929 |
| ENSG00000131203 | IDO1       | 591.0394144 | 1.185990185 | 0.001404377 |
| ENSG00000184979 | USP18      | 386.3323467 | 1.24636106  | 0.004409958 |
| ENSG00000169245 | CXCL10     | 159.5420988 | 1.280293572 | 0.008047931 |
| ENSG00000272512 | AL645608.8 | 21.58800224 | 1.435017641 | 0.011193969 |
| ENSG00000134321 | RSAD2      | 8039.476399 | 1.458053632 | 0.031771793 |
| ENSG00000276566 | IGKV1D-13  | 51.24442257 | 1.555660421 | 0.004864349 |
| ENSG00000158525 | CPA5       | 98.67529285 | 1.583224614 | 0.010157972 |
| ENSG00000163666 | HESX1      | 18.70534655 | 1.58613055  | 0.001653358 |
| ENSG00000109321 | AREG       | 21.26010596 | 1.703704663 | 0.00294204  |
| ENSG00000205837 | LINC00487  | 35.48160773 | 1.70534527  | 0.003115973 |
| ENSG00000206503 | HLA-A      | 14370.23025 | 1.804552712 | 0.00471681  |

### Baseline responders vs. non-responders

| Gene ID         | Gene Name  | Base Mean   | log2 Fold Change | p-value     |
|-----------------|------------|-------------|------------------|-------------|
| ENSG00000225690 | TREML5P    | 83.92634681 | -3.178281735     | 0.002493791 |
| ENSG00000109321 | AREG       | 31.53818795 | -2.830957559     | 0.006488382 |
| ENSG00000153157 | SYCP2L     | 35.07253022 | -2.442217197     | 7.23E-05    |
| ENSG00000230076 | RPL10P6    | 122.4024464 | -2.396636821     | 0.018643438 |
| ENSG00000131042 | LILRB2     | 1127.20738  | -2.035552894     | 0.033669941 |
| ENSG00000165949 | IFI27      | 107.1508879 | -2.00663783      | 0.049948008 |
| ENSG00000034239 | EFCAB1     | 9.342617075 | -1.927370872     | 0.000431489 |
| ENSG00000226102 | SEPT7P3    | 17.1013296  | -1.841403488     | 0.003003959 |
| ENSG00000254810 | AP001189.3 | 16.48749845 | -1.763939272     | 0.003836969 |
| ENSG00000165948 | IFI27L1    | 14.12033814 | -1.734133245     | 0.004703996 |
| ENSG00000283403 | AC005394.2 | 16.90301167 | -1.702319131     | 0.001720586 |
| ENSG00000101115 | SALL4      | 10.61086968 | -1.632941107     | 0.014388446 |
| ENSG00000186115 | CYP4F2     | 18.77040433 | -1.623376504     | 0.026053424 |
| ENSG00000248126 | AC091849.1 | 10.67367778 | -1.576606271     | 0.009678753 |
| ENSG00000162885 | B3GALNT2   | 15.46665776 | -1.574427152     | 0.004137494 |
| ENSG00000198690 | FAN1       | 30.71427648 | -1.52962958      | 0.00643621  |
| ENSG00000067798 | NAV3       | 35.74581997 | -1.515659509     | 0.00201861  |
| ENSG00000278661 | TRAJ37     | 6.130250009 | -1.468735741     | 0.023287348 |
| ENSG00000212541 | RNU6-510P  | 15.52102465 | -1.431150369     | 0.014687305 |
| ENSG00000172602 | RND1       | 17.38184213 | -1.403359365     | 0.005206426 |
| ENSG00000109674 | NEIL3      | 8.741517359 | -1.392283768     | 0.016261151 |
| ENSG00000278745 | AL391903.3 | 56.05067616 | -1.381401736     | 0.027430023 |
| ENSG00000213316 | LTC4S      | 22.9876735  | -1.375054793     | 0.018791251 |
| ENSG00000237926 | AC239367.3 | 20.0470388  | -1.34798276      | 0.047639808 |
| ENSG00000104524 | PYCR3      | 13.27140574 | -1.306044697     | 0.020598837 |
| ENSG00000154380 | ENAH       | 17.94287314 | -1.298339232     | 0.001471727 |
| ENSG00000183421 | RIPK4      | 19.45559226 | -1.289681947     | 0.002892405 |
| ENSG00000224550 | AC114491.1 | 11.87224037 | -1.280202303     | 0.007210708 |
| ENSG00000132622 | HSPA12B    | 17.66565969 | -1.258616973     | 0.025932686 |
| ENSG00000167880 | EVPL       | 88.28980665 | -1.240193963     | 0.049053187 |
| ENSG00000134548 | SPX        | 44.80121624 | -1.228209806     | 0.003795456 |
| ENSG00000228079 | AC012368.2 | 15.08632727 | -1.215440323     | 0.020392451 |
| ENSG00000260423 | LINC02367  | 11.2149439  | -1.208857323     | 0.005186436 |
| ENSG00000205221 | VIT        | 13.40875659 | -1.204067386     | 0.041881528 |
| ENSG00000123219 | CENPK      | 197.9943609 | -1.202263872     | 0.032527582 |
| ENSG00000253552 | HOXA-AS2   | 21.80500962 | -1.20040807      | 0.025361651 |
| ENSG00000250326 | AC104596.1 | 27.00845802 | -1.198169298     | 0.005661441 |
| ENSG00000172640 | OR10AD1    | 9.427617614 | -1.192820788     | 0.037432452 |
| ENSG00000174697 | LEP        | 26.08098158 | -1.167119437     | 0.012796259 |
| ENSG00000129204 | USP6       | 52.48373214 | -1.161148585     | 0.007730595 |
| ENSG00000169255 | B3GALNT1   | 29.61562261 | -1.160449875     | 0.003962178 |
| ENSG00000236397 | DDX11L2    | 284.1689593 | -1.146901117     | 0.015226728 |
| ENSG00000173546 | CSPG4      | 8.778865896 | -1.145181063     | 0.031041661 |
| ENSG00000227359 | AC017074.1 | 12.93114637 | -1.141156359     | 0.006858658 |

|                 |            |             |              |             |
|-----------------|------------|-------------|--------------|-------------|
| ENSG00000164929 | BAALC      | 21.45652018 | -1.130915171 | 0.024188125 |
| ENSG00000198732 | SMOC1      | 17.78756637 | -1.127641568 | 0.008031797 |
| ENSG00000166770 | ZNF667-AS1 | 123.7861992 | -1.097712368 | 0.000456676 |
| ENSG00000152760 | TCTEX1D1   | 13.31489187 | -1.094728943 | 0.027299057 |
| ENSG00000139044 | B4GALNT3   | 469.6170274 | -1.094060872 | 0.028092418 |
| ENSG00000248971 | KRT8P46    | 47.97481951 | -1.072039435 | 0.003532612 |
| ENSG00000197134 | ZNF257     | 64.06609913 | -1.06962979  | 0.015673749 |
| ENSG00000122786 | CALD1      | 54.7223877  | -1.053311717 | 0.000556868 |
| ENSG00000249646 | OR7E94P    | 33.34958563 | -1.04828438  | 0.010583714 |
| ENSG00000135919 | SERPINE2   | 118.2208034 | -1.039086191 | 0.014467613 |
| ENSG00000238041 | AP004245.1 | 6.87458392  | -1.036639696 | 0.037081592 |
| ENSG00000128641 | MYO1B      | 45.70665275 | -1.01965273  | 0.006621375 |
| ENSG00000259803 | SLC22A31   | 25.04315038 | -1.017527064 | 0.029943892 |
| ENSG00000225544 | AC245452.2 | 73.46291385 | -1.00609319  | 0.024375829 |
| ENSG00000256582 | LINC02390  | 31.87086334 | -1.004266589 | 0.021798064 |
| ENSG00000078018 | MAP2       | 20.24666782 | -0.994242613 | 0.047981737 |
| ENSG00000137831 | UACA       | 73.78042182 | -0.979098154 | 0.015293549 |
| ENSG00000236090 | LDHAP3     | 13.9782895  | -0.978207358 | 0.019155168 |
| ENSG00000106772 | PRUNE2     | 171.4157507 | -0.976244574 | 0.013275809 |
| ENSG00000197283 | SYNGAP1    | 104.7974443 | -0.971136332 | 0.01558609  |
| ENSG00000236792 | AL513175.2 | 7.902304576 | -0.970022425 | 0.047028771 |
| ENSG00000085741 | WNT11      | 21.77282252 | -0.965691342 | 0.0129296   |
| ENSG00000196581 | AJAP1      | 56.97217508 | -0.963577727 | 0.018925107 |
| ENSG00000172322 | CLEC12A    | 8855.364358 | -0.953253828 | 0.013974523 |
| ENSG00000204381 | LAYN       | 21.16567213 | -0.950847182 | 0.046629756 |
| ENSG00000184500 | PROS1      | 64.53330261 | -0.948330881 | 0.013335177 |
| ENSG00000005700 | IBTK       | 96.06199394 | -0.936335026 | 0.044599362 |
| ENSG00000230006 | ANKRD36BP2 | 118.8536958 | -0.932921743 | 0.02056605  |
| ENSG00000238241 | CCR12P     | 106.942841  | -0.932148604 | 0.035074749 |
| ENSG00000159860 | TCAF2P1    | 21.7338724  | -0.931584036 | 0.020948357 |
| ENSG00000099250 | NRP1       | 76.45437422 | -0.911213682 | 0.032438288 |
| ENSG00000174123 | TLR10      | 1633.81039  | -0.908546039 | 0.014250096 |
| ENSG00000275854 | AC084824.4 | 19.88994972 | -0.898786564 | 0.033192539 |
| ENSG00000054690 | PLEKHH1    | 17.59966924 | -0.893149151 | 0.041707328 |
| ENSG00000205670 | SMIM11A    | 33.03378589 | -0.889346147 | 0.043248804 |
| ENSG00000272555 | AC009974.1 | 49.02682134 | -0.882077606 | 0.025319112 |
| ENSG00000280079 | AC011447.7 | 23.57306924 | -0.8801472   | 0.002822745 |
| ENSG00000026559 | KCNG1      | 147.6966519 | -0.878726061 | 0.024553566 |
| ENSG00000171798 | KNDC1      | 131.30778   | -0.877741957 | 0.031545121 |
| ENSG00000164056 | SPRY1      | 43.9489627  | -0.875348988 | 0.030631015 |
| ENSG00000219222 | RPL12P47   | 13.34684234 | -0.872259172 | 0.04951295  |
| ENSG00000117519 | CNN3       | 103.8699279 | -0.857017874 | 0.013004106 |
| ENSG00000152990 | ADGRA3     | 88.29251226 | -0.855284448 | 0.010027658 |
| ENSG00000184226 | PCDH9      | 181.6896977 | -0.853991661 | 0.043505159 |
| ENSG00000183691 | NOG        | 483.1635715 | -0.847526052 | 0.031595048 |
| ENSG00000167414 | GNG8       | 31.53455127 | -0.842649348 | 0.049325142 |
| ENSG00000163735 | CXCL5      | 190.8724247 | -0.84126802  | 0.025030297 |

|                 |            |             |              |             |
|-----------------|------------|-------------|--------------|-------------|
| ENSG00000260773 | AC055855.2 | 20.35609808 | -0.839963721 | 0.015761279 |
| ENSG00000267226 | AC104971.2 | 9.679553005 | -0.838056172 | 0.036668202 |
| ENSG00000214189 | ZNF788     | 60.89329258 | -0.832392693 | 0.000122485 |
| ENSG00000160191 | PDE9A      | 243.5961685 | -0.831511107 | 0.002145174 |
| ENSG00000153253 | SCN3A      | 75.14749595 | -0.824302485 | 0.047874376 |
| ENSG00000183960 | KCNH8      | 106.8141539 | -0.804818284 | 0.032229411 |
| ENSG00000091972 | CD200      | 261.8953351 | -0.803568459 | 0.007916521 |
| ENSG00000261754 | AC008555.1 | 64.16726667 | -0.798250306 | 0.003390528 |
| ENSG00000167191 | GPRC5B     | 54.76211908 | -0.79284731  | 0.038822846 |
| ENSG00000154914 | USP43      | 29.51798919 | -0.792787168 | 0.033663874 |
| ENSG00000164120 | HPGD       | 301.3447291 | -0.792368349 | 0.044631959 |
| ENSG00000254473 | AL354920.1 | 46.55130673 | -0.791173651 | 0.018960195 |
| ENSG00000272092 | AC087623.3 | 18.29138542 | -0.786608482 | 0.009751717 |
| ENSG00000246430 | LINC00968  | 43.88740046 | -0.782149204 | 0.015418143 |
| ENSG00000108852 | MPP2       | 81.14555269 | -0.775761908 | 0.0396558   |
| ENSG00000163736 | PPBP       | 2550.943597 | -0.772812541 | 0.022517151 |
| ENSG00000142188 | TMEM50B    | 52.64097154 | -0.769468513 | 0.038732059 |
| ENSG00000272034 | SNORD14A   | 84.93824007 | -0.766443367 | 0.036891332 |
| ENSG00000236762 | RPL19P16   | 16.26522156 | -0.762683891 | 0.039300213 |
| ENSG00000104267 | CA2        | 778.6405946 | -0.762578308 | 0.021214242 |
| ENSG00000197632 | SERPINB2   | 88.33068513 | -0.751869057 | 0.007129642 |
| ENSG00000104341 | LAPTM4B    | 243.9156749 | -0.734201673 | 0.033837554 |
| ENSG00000143942 | CHAC2      | 62.79933534 | -0.726865415 | 0.028123108 |
| ENSG00000224183 | SDHDP6     | 85.15089948 | -0.726663071 | 0.006222753 |
| ENSG00000240875 | LINC00886  | 66.33138855 | -0.7123675   | 0.045243813 |
| ENSG00000211771 | TRBJ2-7    | 102.4040892 | -0.70719249  | 0.027966787 |
| ENSG00000205038 | PKHD1L1    | 38.72115552 | -0.698847867 | 0.008562773 |
| ENSG00000002587 | HS3ST1     | 78.0332351  | -0.697267377 | 0.013556609 |
| ENSG00000250334 | LINC00989  | 269.1096757 | -0.695594035 | 0.044282886 |
| ENSG00000266931 | AC125232.2 | 32.66241252 | -0.694236951 | 0.019023969 |
| ENSG00000267508 | ZNF285     | 97.42799436 | -0.690615188 | 0.021798955 |
| ENSG00000106537 | TSPAN13    | 520.0516732 | -0.684739772 | 0.027101034 |
| ENSG00000188739 | RBM34      | 42.21919529 | -0.67429034  | 0.03246837  |
| ENSG00000117013 | KCNQ4      | 26.12656142 | -0.668986056 | 0.034823799 |
| ENSG00000005513 | SOX8       | 151.4831205 | -0.666778621 | 0.045099078 |
| ENSG00000125869 | LAMP5      | 138.9384641 | -0.66211805  | 0.022192689 |
| ENSG00000165682 | CLEC1B     | 373.4979918 | -0.661439234 | 0.042997011 |
| ENSG00000005249 | PRKAR2B    | 279.8653181 | -0.659882908 | 0.043630972 |
| ENSG00000105971 | CAV2       | 26.58471469 | -0.658625388 | 0.033086527 |
| ENSG00000091622 | PITPNM3    | 38.2928158  | -0.656445721 | 0.013057718 |
| ENSG00000240356 | RPL23AP7   | 267.4880402 | -0.645249793 | 0.021365995 |
| ENSG00000172985 | SH3RF3     | 531.4271983 | -0.639409891 | 0.007160186 |
| ENSG00000171291 | ZNF439     | 518.8930258 | -0.637062601 | 0.017067513 |
| ENSG00000229939 | AL589880.1 | 39.83507648 | -0.636653417 | 0.039409838 |
| ENSG00000105426 | PTPRS      | 297.1964602 | -0.629198753 | 0.042042345 |
| ENSG00000136999 | NOV        | 883.8384105 | -0.622088435 | 0.043744773 |
| ENSG00000169439 | SDC2       | 179.5713257 | -0.618624466 | 0.031135637 |

|                 |             |             |              |             |
|-----------------|-------------|-------------|--------------|-------------|
| ENSG00000270562 | AC097634.1  | 137.8846103 | -0.612774439 | 0.008047286 |
| ENSG00000188171 | ZNF626      | 184.0462752 | -0.6037681   | 0.030721899 |
| ENSG00000121570 | DPPA4       | 40.1788173  | -0.595376261 | 0.045978266 |
| ENSG00000226352 | PSPC1-AS2   | 46.16830963 | -0.593978343 | 0.019639826 |
| ENSG00000179889 | PDXDC1      | 162.1276489 | -0.583436792 | 0.03710436  |
| ENSG00000112655 | PTK7        | 271.8167509 | -0.572291602 | 0.045185073 |
| ENSG00000233355 | CHRM3-AS2   | 2211.409249 | -0.568924469 | 0.04579287  |
| ENSG00000139880 | CDH24       | 89.80963532 | -0.553960533 | 0.020434811 |
| ENSG00000275964 | AL355001.2  | 91.88865686 | -0.528918525 | 0.009655171 |
| ENSG00000165943 | MOAP1       | 46.31187138 | -0.523961686 | 0.032044968 |
| ENSG00000164512 | ANKRD55     | 503.1575541 | -0.52215214  | 0.047442444 |
| ENSG00000197744 | PTMAP2      | 131.3743887 | -0.515752401 | 0.040506747 |
| ENSG00000236345 | AL354719.2  | 220.7389476 | -0.513619748 | 0.044347859 |
| ENSG00000172594 | SMPDL3A     | 418.5073417 | -0.511023334 | 0.040818389 |
| ENSG00000154153 | RETREG1     | 752.7897246 | -0.503244639 | 0.03981984  |
| ENSG00000110042 | DTX4        | 1343.977208 | -0.500037954 | 0.012332519 |
| ENSG00000124225 | PMEPA1      | 297.1385963 | -0.484243833 | 0.010192379 |
| ENSG00000099139 | PCSK5       | 519.593061  | -0.478710786 | 0.039452882 |
| ENSG00000126217 | MCF2L       | 325.9048161 | -0.459965444 | 0.032860026 |
| ENSG00000274712 | AC005332.7  | 470.8803545 | -0.44393328  | 0.043753592 |
| ENSG00000140092 | FBLN5       | 680.2658028 | -0.436025128 | 0.034864153 |
| ENSG00000169762 | TAPT1       | 1556.2627   | -0.433754028 | 0.016909966 |
| ENSG00000106484 | MEST        | 156.3493416 | -0.428412502 | 0.03321992  |
| ENSG00000164649 | CDCA7L      | 697.9530523 | -0.412637381 | 0.022821728 |
| ENSG00000144218 | AFF3        | 868.1156225 | -0.405582425 | 0.025345641 |
| ENSG00000213213 | CCDC183     | 68.74897917 | -0.3918615   | 0.044849708 |
| ENSG00000120451 | SNX19       | 4108.440407 | -0.389522633 | 0.01617797  |
| ENSG00000186187 | ZNRF1       | 359.8223184 | 0.37893987   | 0.03574889  |
| ENSG00000125388 | GRK4        | 81.29327983 | 0.380855337  | 0.049944754 |
| ENSG00000106327 | TFR2        | 271.5227955 | 0.397628278  | 0.043001035 |
| ENSG00000214975 | PPIAP29     | 145.679054  | 0.425128379  | 0.025345461 |
| ENSG00000147454 | SLC25A37    | 104626.8985 | 0.447067309  | 0.04559021  |
| ENSG00000115902 | SLC1A4      | 653.9175321 | 0.467677318  | 0.004933834 |
| ENSG00000236565 | HNRNPA3P5   | 90.5437156  | 0.470803281  | 0.013706798 |
| ENSG00000168487 | BMP1        | 334.7572301 | 0.471528286  | 0.040355224 |
| ENSG00000162461 | SLC25A34    | 110.6025758 | 0.479032164  | 0.042262579 |
| ENSG00000107954 | NEURL1      | 761.284512  | 0.481869206  | 0.040417983 |
| ENSG00000166446 | CDYL2       | 448.6730756 | 0.484705495  | 0.033834036 |
| ENSG00000172965 | MIR4435-2HG | 1230.68593  | 0.500602122  | 0.037508826 |
| ENSG00000065621 | GSTO2       | 82.82796807 | 0.510401386  | 0.016065928 |
| ENSG00000112599 | GUCA1B      | 118.6071902 | 0.531044684  | 0.022645686 |
| ENSG00000235505 | AP002004.1  | 352.643936  | 0.53942062   | 0.0243548   |
| ENSG00000172215 | CXCR6       | 842.8030181 | 0.54612564   | 0.035674462 |
| ENSG00000266088 | AC004585.1  | 167.5646039 | 0.54825847   | 0.027435029 |
| ENSG00000143554 | SLC27A3     | 219.4725598 | 0.552724895  | 0.034923755 |
| ENSG00000223551 | TMSB4XP4    | 371.1023276 | 0.552777576  | 0.041520917 |
| ENSG00000254206 | NPIP11      | 244.5743285 | 0.558528721  | 0.035512901 |



|                 |            |             |             |             |
|-----------------|------------|-------------|-------------|-------------|
| ENSG00000230747 | AC021188.1 | 52.33730636 | 0.561397254 | 0.027903729 |
| ENSG00000222041 | CYTOR      | 525.6450831 | 0.569723372 | 0.007776137 |
| ENSG00000146054 | TRIM7      | 213.9511041 | 0.576749266 | 0.026284949 |
| ENSG00000141028 | CDRT15P1   | 63.67230361 | 0.581144421 | 0.036883773 |
| ENSG00000186715 | MST1L      | 69.9061874  | 0.584497782 | 0.049856464 |
| ENSG00000162438 | CTRC       | 46.65714017 | 0.595895566 | 0.038758042 |
| ENSG00000244617 | ASPRV1     | 1356.092687 | 0.601241922 | 0.045820182 |
| ENSG00000267281 | AC023509.3 | 97.44772023 | 0.616429585 | 0.02948283  |
| ENSG00000174871 | CNIH2      | 59.83658826 | 0.624496398 | 0.019795843 |
| ENSG00000241657 | TRBV11-2   | 214.9532597 | 0.635164975 | 0.021641735 |
| ENSG00000129038 | LOXL1      | 56.20910545 | 0.639923114 | 0.03742517  |
| ENSG00000072952 | MRVI1      | 4921.236666 | 0.640462723 | 0.013077743 |
| ENSG00000265787 | CYP4F35P   | 71.32488577 | 0.640526112 | 0.02549685  |
| ENSG00000260517 | AC009093.2 | 99.56236899 | 0.641296262 | 0.017889249 |
| ENSG00000133800 | LYVE1      | 70.65394747 | 0.643768405 | 0.02556854  |
| ENSG00000170396 | ZNF804A    | 29.03622768 | 0.646355075 | 0.019853924 |
| ENSG00000089692 | LAG3       | 619.2571761 | 0.64650101  | 0.016353951 |
| ENSG00000158423 | RIBC1      | 34.51053604 | 0.656081053 | 0.012225883 |
| ENSG00000105464 | GRIN2D     | 35.49857268 | 0.659861409 | 0.034024579 |
| ENSG00000101307 | SIRPB1     | 15225.11426 | 0.660111513 | 0.038613532 |
| ENSG00000240914 | AL121612.1 | 29.13218451 | 0.660448235 | 0.049891429 |
| ENSG00000163975 | MELTF      | 44.58548244 | 0.677381849 | 0.034273278 |
| ENSG00000233392 | AC104809.2 | 626.5947749 | 0.680444895 | 0.02518366  |
| ENSG00000252965 | Y_RNA      | 36.2451722  | 0.681046085 | 0.027794078 |
| ENSG00000203812 | HIST2H2AA3 | 326.1351575 | 0.681924572 | 0.044928742 |
| ENSG00000159640 | ACE        | 125.4141709 | 0.68240224  | 0.017681666 |
| ENSG00000164989 | CCDC171    | 28.09860969 | 0.689213965 | 0.035528257 |
| ENSG00000260810 | AL135818.2 | 49.34068985 | 0.698265937 | 0.024570393 |
| ENSG00000111728 | ST8SIA1    | 197.6423215 | 0.711012514 | 0.028301449 |
| ENSG00000125462 | C1orf61    | 38.28056337 | 0.717909652 | 0.029805864 |
| ENSG00000133661 | SFTPD      | 33.496714   | 0.729432796 | 0.042939113 |
| ENSG00000233750 | CICP27     | 126.4387325 | 0.731200465 | 0.03078787  |
| ENSG00000105246 | EBI3       | 24.22196502 | 0.733927118 | 0.019730862 |
| ENSG00000178878 | APOLD1     | 115.4434656 | 0.734639399 | 0.003443725 |
| ENSG00000164082 | GRM2       | 59.23905201 | 0.737149883 | 0.015576694 |
| ENSG00000272196 | HIST2H2AA4 | 92.5033273  | 0.74682721  | 0.026441863 |
| ENSG00000104883 | PEX11G     | 74.36941311 | 0.753201165 | 0.049449373 |
| ENSG00000272009 | AL121944.1 | 19.75548667 | 0.757937984 | 0.04531994  |
| ENSG00000189233 | NUGGC      | 126.9845978 | 0.758783214 | 0.008592349 |
| ENSG00000228834 | AL445189.2 | 44.42643917 | 0.763543881 | 0.03923205  |
| ENSG00000172927 | MYEOV      | 66.52107388 | 0.799576746 | 0.038826678 |
| ENSG00000237169 | RPL12P27   | 79.75792952 | 0.810154301 | 0.003944289 |
| ENSG00000151952 | TMEM132D   | 48.95904326 | 0.816302518 | 0.034152059 |
| ENSG00000198468 | FLVCR1-AS1 | 173.4271921 | 0.816830804 | 0.049445451 |
| ENSG00000237575 | PYY2       | 18.75363229 | 0.819720375 | 0.049717978 |
| ENSG00000227376 | FTH1P16    | 17.9027667  | 0.828110438 | 0.010754168 |
| ENSG00000169715 | MT1E       | 90.45393515 | 0.836955483 | 0.006962775 |

|                 |            |             |             |             |
|-----------------|------------|-------------|-------------|-------------|
| ENSG00000237927 | AL078604.2 | 48.42323612 | 0.84466275  | 0.047415593 |
| ENSG00000233214 | AC002511.2 | 118.583544  | 0.845724627 | 0.04704503  |
| ENSG00000214867 | SRSF9P1    | 18.93086939 | 0.852148347 | 0.029029756 |
| ENSG00000218357 | LINC01644  | 32.90295011 | 0.863509217 | 0.047353117 |
| ENSG00000273032 | DGCR9      | 32.0588605  | 0.868969044 | 0.011410649 |
| ENSG00000197353 | LYPD2      | 163.9595629 | 0.880642152 | 0.017038414 |
| ENSG00000183570 | PCBP3      | 202.0635901 | 0.883806986 | 0.02326779  |
| ENSG00000173578 | XCR1       | 55.14953649 | 0.890787254 | 0.039042874 |
| ENSG00000176834 | VSIG10     | 226.7856426 | 0.900314265 | 0.02947516  |
| ENSG00000198883 | PNMA5      | 29.01336372 | 0.904296319 | 0.019951154 |
| ENSG00000262636 | AC099489.2 | 24.90520726 | 0.913007673 | 0.032083222 |
| ENSG00000198756 | COLGALT2   | 140.8597228 | 0.914398288 | 0.005444544 |
| ENSG00000240583 | AQP1       | 114.8429521 | 0.923466048 | 0.029482046 |
| ENSG00000234776 | C11orf94   | 9.546177006 | 0.923795016 | 0.043229693 |
| ENSG00000226469 | ADAM1B     | 22.76123478 | 0.926380265 | 0.025047556 |
| ENSG00000162551 | ALPL       | 23823.46893 | 0.927345223 | 0.009280528 |
| ENSG00000230734 | RPL10P3    | 26.57623535 | 0.934650969 | 0.046537472 |
| ENSG00000016391 | CHDH       | 17.89101162 | 0.935734479 | 0.037925343 |
| ENSG00000164850 | GPBR1      | 115.2320774 | 0.93697538  | 0.044931604 |
| ENSG00000272690 | LINC02018  | 27.074439   | 0.942604312 | 0.002744033 |
| ENSG00000166736 | HTR3A      | 32.03825129 | 0.944634922 | 0.044842926 |
| ENSG00000256581 | NLRP9P1    | 70.93936791 | 0.947772649 | 0.006932208 |
| ENSG00000259182 | AC019254.1 | 53.19408013 | 0.962163412 | 0.023873552 |
| ENSG00000245888 | FLJ21408   | 42.01388003 | 0.962544392 | 0.017262797 |
| ENSG00000249896 | LINC02495  | 10.42592547 | 0.963247853 | 0.030929889 |
| ENSG00000223722 | AC023157.1 | 102.3756215 | 0.973213697 | 0.018019115 |
| ENSG00000278611 | AC008567.3 | 14.7283207  | 0.988320125 | 0.044594102 |
| ENSG00000232748 | AC135050.1 | 17.81964718 | 0.996166358 | 0.019212377 |
| ENSG00000234076 | TPRG1-AS1  | 10.81279528 | 1.009686863 | 0.025869591 |
| ENSG00000250486 | FAM218A    | 12.76289773 | 1.034537553 | 0.047319736 |
| ENSG00000237276 | ANO7L1     | 78.35481972 | 1.038944794 | 0.02600384  |
| ENSG00000170231 | FABP6      | 41.19331895 | 1.042661317 | 0.024798435 |
| ENSG00000166025 | AMOTL1     | 111.8599945 | 1.042838578 | 0.047432924 |
| ENSG00000223935 | AC008074.1 | 28.22319707 | 1.045436501 | 0.014761138 |
| ENSG00000233791 | LINC01136  | 52.14546674 | 1.056977968 | 0.046387376 |
| ENSG00000267197 | AC011461.1 | 18.44495485 | 1.064623437 | 0.016550634 |
| ENSG00000239300 | AC080162.1 | 21.57070225 | 1.079773602 | 0.041266494 |
| ENSG00000197766 | CFD        | 246.6864385 | 1.087742569 | 0.03645212  |
| ENSG00000235978 | AC018816.1 | 19.88552238 | 1.093764547 | 0.001018759 |
| ENSG00000182586 | LINC00334  | 15.79901394 | 1.100793545 | 0.044250223 |
| ENSG00000270972 | AC136475.9 | 361.9737289 | 1.101497159 | 0.035760447 |
| ENSG00000266274 | RN7SL138P  | 25.87343295 | 1.102046063 | 0.015835166 |
| ENSG00000238062 | SPATA3-AS1 | 21.23489327 | 1.113229228 | 0.047179262 |
| ENSG00000167992 | VWCE       | 852.2292583 | 1.115816659 | 0.024408503 |
| ENSG00000278985 | AC092718.7 | 13.04750809 | 1.118899487 | 0.041979674 |
| ENSG00000095739 | BAMBI      | 18.03188484 | 1.119822285 | 0.025959543 |
| ENSG00000099998 | GGT5       | 111.3816437 | 1.120702894 | 0.008927848 |

|                 |            |             |             |             |
|-----------------|------------|-------------|-------------|-------------|
| ENSG00000247317 | AC105202.1 | 15.06206748 | 1.133942241 | 0.020633673 |
| ENSG00000255328 | AC136475.5 | 251.1304095 | 1.137529495 | 0.038246489 |
| ENSG00000261433 | AC002347.1 | 7.557003828 | 1.140252596 | 0.038101255 |
| ENSG00000235150 | RCBTB2P1   | 14.94471894 | 1.150910735 | 0.023071059 |
| ENSG00000253736 | AC022217.3 | 16.1013279  | 1.156910425 | 0.003407129 |
| ENSG00000270030 | AC136475.7 | 28.40776091 | 1.169124007 | 0.033748613 |
| ENSG00000277152 | AC110048.2 | 28.10038009 | 1.181773358 | 0.025102537 |
| ENSG00000279164 | AL118508.3 | 20.08118009 | 1.186789825 | 0.01808249  |
| ENSG00000250966 | AC023886.2 | 9.342163714 | 1.186833431 | 0.012074457 |
| ENSG00000229515 | FLT1P1     | 97.54650186 | 1.193100186 | 0.006628064 |
| ENSG00000250155 | AC008957.1 | 48.51962503 | 1.193310494 | 0.000593244 |
| ENSG00000225940 | C5orf67    | 40.84526919 | 1.194909156 | 0.001199222 |
| ENSG00000254017 | IGHEP2     | 17.92361526 | 1.19789814  | 0.030780963 |
| ENSG00000267496 | FAM215A    | 12.13514483 | 1.225923172 | 0.023368614 |
| ENSG00000223298 | RNY3P8     | 16.34363378 | 1.231746268 | 0.041104278 |
| ENSG00000272223 | AL136304.1 | 13.00805018 | 1.234921912 | 0.012013396 |
| ENSG00000143603 | KCNN3      | 12.95580591 | 1.240336431 | 0.00897608  |
| ENSG00000084710 | EFR3B      | 45.69043671 | 1.245665652 | 0.011035548 |
| ENSG00000240563 | L1TD1      | 24.65648428 | 1.251393133 | 0.043601191 |
| ENSG00000180071 | ANKRD18A   | 17.42913891 | 1.275361578 | 0.028931508 |
| ENSG00000274695 | AC108704.1 | 11.42665395 | 1.28457389  | 0.034358187 |
| ENSG00000241244 | IGKV1D-16  | 53.91595039 | 1.293560859 | 0.038182467 |
| ENSG00000282024 | AL009031.1 | 29.72620737 | 1.313552035 | 0.019954768 |
| ENSG00000189337 | KAZN       | 429.8843051 | 1.318420531 | 0.026948097 |
| ENSG00000229331 | GK-IT1     | 27.4282255  | 1.322688422 | 0.007076679 |
| ENSG00000266970 | AC061992.1 | 14.52693786 | 1.327826264 | 0.009748874 |
| ENSG00000130202 | NECTIN2    | 506.9945399 | 1.329407544 | 0.006824897 |
| ENSG00000278599 | TBC1D3E    | 87.12672438 | 1.334312635 | 0.016674286 |
| ENSG00000161055 | SCGB3A1    | 48.23963777 | 1.355484383 | 0.04212921  |
| ENSG00000235888 | AF064858.1 | 13.88945565 | 1.361484448 | 0.003634016 |
| ENSG00000197993 | KEL        | 29.56691161 | 1.368247841 | 0.028380151 |
| ENSG00000272541 | AL021368.3 | 10.52127083 | 1.374546949 | 0.023283379 |
| ENSG00000187244 | BCAM       | 63.52637187 | 1.388937089 | 0.009498633 |
| ENSG00000168917 | SLC35G2    | 22.27307628 | 1.39838697  | 0.023786768 |
| ENSG00000279641 | AC120057.4 | 12.49159    | 1.409988916 | 0.004009299 |
| ENSG00000275719 | AC008622.2 | 8.118752709 | 1.410734936 | 0.018776654 |
| ENSG00000240890 | AC020633.1 | 14.43606905 | 1.422919102 | 0.008999518 |
| ENSG00000237973 | MTCO1P12   | 1545.069163 | 1.449219879 | 0.012585175 |
| ENSG00000158865 | SLC5A11    | 14.59811178 | 1.456195381 | 0.012910915 |
| ENSG00000283294 | AP005212.5 | 10.7234581  | 1.462019863 | 0.033052366 |
| ENSG00000278635 | AC141557.2 | 19.56053636 | 1.481664475 | 0.032467719 |
| ENSG00000227189 | AC092535.1 | 11.41364223 | 1.512594933 | 0.005621514 |
| ENSG00000175445 | LPL        | 42.9406978  | 1.570459754 | 0.014820557 |
| ENSG00000214944 | ARHGEF28   | 18.82643894 | 1.586952265 | 0.011982705 |
| ENSG00000107731 | UNC5B      | 31.51702769 | 1.664562922 | 0.004387605 |
| ENSG00000279942 | AL353597.3 | 130.492449  | 1.806605144 | 0.031057869 |
| ENSG00000172348 | RCAN2      | 16.66512973 | 1.832009694 | 0.019771089 |

|                 |            |             |             |             |
|-----------------|------------|-------------|-------------|-------------|
| ENSG00000204933 | CD177P1    | 20.62550911 | 2.055862448 | 0.023265056 |
| ENSG00000204110 | LINC02520  | 50.66906735 | 2.156243639 | 0.012859797 |
| ENSG00000224114 | AL591846.1 | 73.99551896 | 2.325767964 | 0.046842991 |
| ENSG00000204482 | LST1       | 14.15695287 | 2.362896329 | 0.000422498 |
| ENSG00000262902 | MTCO1P40   | 11.98291798 | 2.676989822 | 0.000946296 |











## MADRS

| Gene ID         | Gene Name  | Base Mean   | Regression Coefficient | p-value     |
|-----------------|------------|-------------|------------------------|-------------|
| ENSG00000262180 | OCLM       | 10.12766313 | -3.418086703           | 0.002916003 |
| ENSG00000228028 | AC069257.1 | 8.546826043 | -3.360952058           | 0.008268987 |
| ENSG00000257594 | GALNT4     | 10.07790391 | -3.282611277           | 0.00791509  |
| ENSG00000270115 | AL513327.3 | 9.816827726 | -3.14863819            | 0.002496924 |
| ENSG00000264188 | AC106037.1 | 20.1895707  | -3.103067804           | 0.000414522 |
| ENSG00000100652 | SLC10A1    | 14.25858923 | -2.950764836           | 0.005023338 |
| ENSG00000280355 | AL132656.4 | 10.14664358 | -2.938245165           | 0.022481625 |
| ENSG00000274276 | CBSL       | 24.26109755 | -2.878198951           | 0.008993041 |
| ENSG00000269937 | AC093525.7 | 11.76060169 | -2.801151981           | 0.005459622 |
| ENSG00000259379 | MTND5P32   | 12.2493515  | -2.780589418           | 0.048932922 |
| ENSG00000230289 | AL358781.2 | 8.20024321  | -2.773437384           | 0.004238696 |
| ENSG00000226012 | AP001434.1 | 11.34838494 | -2.770609001           | 0.010079264 |
| ENSG00000123500 | COL10A1    | 8.683649247 | -2.762065168           | 0.025192378 |
| ENSG00000278881 | FP325331.1 | 18.72001666 | -2.666862497           | 0.004261037 |
| ENSG00000260618 | AC025917.1 | 37.80580841 | -2.491920966           | 0.003828056 |
| ENSG00000263627 | PPP4R1-AS1 | 8.929610026 | -2.48851791            | 0.013948644 |
| ENSG00000114204 | SERPINI2   | 16.54594333 | -2.430380262           | 0.006421863 |
| ENSG00000145623 | OSMR       | 11.022553   | -2.392383309           | 0.027698274 |
| ENSG00000271580 | AL583832.1 | 16.34154627 | -2.371565378           | 0.002938075 |
| ENSG00000279608 | AL353795.3 | 10.63167457 | -2.368926992           | 0.041279839 |
| ENSG00000177427 | MIEF2      | 17.88099623 | -2.325990961           | 0.003781349 |
| ENSG00000279430 | AL590560.3 | 7.952713059 | -2.324087408           | 0.035667996 |
| ENSG00000241547 | ACTG1P20   | 9.863185902 | -2.297390204           | 0.039118617 |
| ENSG00000250893 | AC098869.2 | 15.56038099 | -2.2791917             | 0.039620237 |
| ENSG00000276593 | AC022306.3 | 9.256436984 | -2.271959431           | 0.039172337 |
| ENSG00000213316 | LTC4S      | 22.25597472 | -2.269457816           | 0.010273859 |
| ENSG00000180535 | BHLHA15    | 12.50865427 | -2.248384453           | 0.04466813  |
| ENSG00000281195 | AC007878.1 | 22.3595521  | -2.242996117           | 0.028436048 |
| ENSG00000235910 | APOA1-AS   | 8.184228292 | -2.194287963           | 0.037048906 |
| ENSG00000062370 | ZNF112     | 15.3626459  | -2.192798187           | 0.006970881 |
| ENSG00000258919 | AL049836.1 | 12.0674799  | -2.188550543           | 0.025622218 |
| ENSG00000215267 | AKR1C7P    | 10.02191353 | -2.181438388           | 0.021864078 |
| ENSG00000281183 | NPTN-IT1   | 88.31188936 | -2.179560183           | 0.001463    |
| ENSG00000258725 | PRC1-AS1   | 7.938186887 | -2.124920004           | 0.046921495 |
| ENSG00000257094 | AC016957.1 | 14.70051025 | -2.123347858           | 0.007880387 |
| ENSG00000261208 | AL365475.1 | 22.61732673 | -2.099139557           | 0.036569256 |
| ENSG00000235499 | AC073046.1 | 36.14020358 | -2.099056674           | 0.005418095 |
| ENSG00000258824 | AL122035.1 | 17.58432241 | -2.07530226            | 0.01645802  |
| ENSG00000256357 | AL132708.1 | 8.067936464 | -2.072973275           | 0.037630975 |
| ENSG00000277224 | HIST1H2BF  | 27.65230329 | -2.043894347           | 0.006861733 |
| ENSG00000236194 | AC099811.1 | 14.60432294 | -2.036674246           | 0.0280205   |
| ENSG00000251229 | AL645924.2 | 13.22413062 | -2.019397444           | 0.032925004 |
| ENSG00000223553 | SMPD4P1    | 38.06869649 | -2.005501542           | 0.007359848 |
| ENSG00000185674 | LYG2       | 6.207792536 | -1.9923159             | 0.044741342 |

|                 |            |             |              |             |
|-----------------|------------|-------------|--------------|-------------|
| ENSG00000137809 | ITGA11     | 12.02576999 | -1.986409109 | 0.048338324 |
| ENSG00000180447 | GAS1       | 14.32498189 | -1.978809594 | 0.034687032 |
| ENSG00000279541 | AC005261.6 | 11.88584372 | -1.962317462 | 0.036949345 |
| ENSG00000228477 | AL663070.1 | 9.245292888 | -1.957589179 | 0.047809974 |
| ENSG00000276248 | AL442125.1 | 30.6851303  | -1.956198718 | 0.006006099 |
| ENSG00000154274 | C4orf19    | 29.10449247 | -1.930699411 | 0.005181739 |
| ENSG00000132464 | ENAM       | 13.6350703  | -1.92731429  | 0.040600742 |
| ENSG00000252391 | RNU6-638P  | 14.58176067 | -1.91330792  | 0.042025059 |
| ENSG00000120729 | MYOT       | 11.89646066 | -1.907362055 | 0.049294032 |
| ENSG00000279412 | AC020763.3 | 34.55463022 | -1.903618654 | 0.021540697 |
| ENSG00000104524 | PYCR3      | 13.88648854 | -1.902371193 | 0.044642066 |
| ENSG00000266983 | AC011444.1 | 11.4217424  | -1.892923542 | 0.02197731  |
| ENSG00000279356 | AC007610.4 | 13.2831253  | -1.878774533 | 0.048698433 |
| ENSG00000181227 | DLSTP1     | 17.44293129 | -1.873344098 | 0.028030235 |
| ENSG00000271725 | AC103858.1 | 23.00878696 | -1.866054245 | 0.0111578   |
| ENSG00000211452 | DIO1       | 20.64990681 | -1.863804905 | 0.015440823 |
| ENSG00000272416 | AC025175.1 | 11.98023108 | -1.860438391 | 0.035221674 |
| ENSG00000160200 | CBS        | 28.21026486 | -1.854301202 | 0.013234456 |
| ENSG00000258922 | AC106028.2 | 11.60644685 | -1.84935113  | 0.047485016 |
| ENSG00000230191 | AC006970.1 | 21.63621675 | -1.845749974 | 0.046589381 |
| ENSG00000178440 | LINC00843  | 20.47001162 | -1.845145479 | 0.021524895 |
| ENSG00000233436 | BTBD18     | 15.5606223  | -1.844051158 | 0.014116379 |
| ENSG00000230373 | GOLGA6L5P  | 20.1890306  | -1.8309531   | 0.029146237 |
| ENSG00000253854 | AC010834.3 | 37.78546627 | -1.827154351 | 0.00485201  |
| ENSG00000278817 | AC007325.4 | 33.40391346 | -1.821830305 | 0.004780892 |
| ENSG00000263370 | AC104564.2 | 17.27305823 | -1.817137785 | 0.048002074 |
| ENSG00000281530 | AC004461.2 | 49.13147542 | -1.815409846 | 0.006942863 |
| ENSG00000235101 | SETP9      | 13.06793432 | -1.805850098 | 0.027580809 |
| ENSG00000105855 | ITGB8      | 43.60483977 | -1.797478748 | 0.036819586 |
| ENSG00000263786 | AC022211.1 | 21.08875187 | -1.76765693  | 0.028461111 |
| ENSG00000005700 | IBTK       | 94.72975234 | -1.762447785 | 0.001578486 |
| ENSG00000273306 | AC018690.1 | 22.79680254 | -1.726974159 | 0.003140828 |
| ENSG00000276603 | AL109614.1 | 21.10238472 | -1.721466793 | 0.006853415 |
| ENSG00000152527 | PLEKHH2    | 32.93911986 | -1.721060504 | 0.003540277 |
| ENSG00000232334 | AL683842.1 | 56.17903906 | -1.708427015 | 0.020518673 |
| ENSG00000232713 | AC010733.1 | 29.84362803 | -1.689270663 | 0.006140982 |
| ENSG00000107249 | GLIS3      | 32.39022722 | -1.677820093 | 0.019594717 |
| ENSG00000058335 | RASGRF1    | 20.78286946 | -1.666669178 | 0.01024579  |
| ENSG00000248971 | KRT8P46    | 46.86495509 | -1.66369649  | 0.009505595 |
| ENSG00000065328 | MCM10      | 16.14765056 | -1.661583607 | 0.04762084  |
| ENSG00000280604 | AJ239328.1 | 37.30223619 | -1.645555858 | 0.005241809 |
| ENSG00000007314 | SCN4A      | 29.04275061 | -1.641842158 | 0.010652398 |
| ENSG00000211664 | IGLV2-18   | 78.68057873 | -1.638360083 | 0.021300668 |
| ENSG00000273724 | AC106782.5 | 32.08402996 | -1.621427358 | 0.003742793 |
| ENSG00000228434 | AC004951.1 | 27.93013266 | -1.619519755 | 0.020068618 |
| ENSG00000279145 | AC011912.1 | 31.14938137 | -1.616540993 | 0.011784164 |
| ENSG00000243659 | FO393419.3 | 22.3891952  | -1.611282506 | 0.016839656 |

|                 |              |             |              |             |
|-----------------|--------------|-------------|--------------|-------------|
| ENSG00000232630 | PRPS1P2      | 60.2121005  | -1.611048964 | 0.005487109 |
| ENSG00000251194 | AL133330.1   | 41.86918574 | -1.608886923 | 0.028912504 |
| ENSG00000254756 | AP001107.6   | 17.05656217 | -1.605011037 | 0.030702888 |
| ENSG00000239264 | TXNDC5       | 17.03596607 | -1.598608551 | 0.047701691 |
| ENSG00000274751 | AC120498.9   | 23.25636894 | -1.59555005  | 0.020990144 |
| ENSG00000198690 | FAN1         | 31.10585787 | -1.574546483 | 0.03650213  |
| ENSG00000177103 | DSCAML1      | 14.69070747 | -1.563586657 | 0.0495953   |
| ENSG00000231595 | AC005224.1   | 19.8948004  | -1.549211129 | 0.013398006 |
| ENSG00000146122 | DAAM2        | 208.8334161 | -1.540418754 | 0.042827496 |
| ENSG00000273812 | BX640514.2   | 19.14196374 | -1.53904298  | 0.038262421 |
| ENSG00000111537 | IFNG         | 26.93418748 | -1.538982284 | 0.029483089 |
| ENSG00000206965 | RNU6-5P      | 25.92844726 | -1.53178648  | 0.012887205 |
| ENSG00000230756 | RHOQP3       | 14.77806638 | -1.529958265 | 0.047826305 |
| ENSG00000279583 | AC009086.3   | 18.73964818 | -1.526087318 | 0.018472542 |
| ENSG00000157999 | ANKRD61      | 22.85017456 | -1.524791008 | 0.025784744 |
| ENSG00000274290 | HIST1H2BE    | 39.75525424 | -1.516420966 | 0.029462597 |
| ENSG00000168852 | TPTE2P5      | 19.05759601 | -1.493038519 | 0.025666246 |
| ENSG00000272402 | AL031775.2   | 17.45656661 | -1.489091282 | 0.02991618  |
| ENSG00000221937 | TAS2R40      | 26.6048154  | -1.475349285 | 0.045128801 |
| ENSG00000234911 | TEX21P       | 35.61560322 | -1.475010138 | 0.019880162 |
| ENSG00000230562 | FAM133DP     | 25.61916506 | -1.464369744 | 0.007733046 |
| ENSG00000102098 | SCML2        | 40.62101919 | -1.448455229 | 0.003181803 |
| ENSG00000182327 | GLTPD2       | 19.27284145 | -1.433049179 | 0.032931741 |
| ENSG00000253559 | OSGEPL1-AS1  | 19.7803518  | -1.425305784 | 0.041854825 |
| ENSG00000267385 | AC011498.4   | 42.92172982 | -1.408500984 | 0.024851165 |
| ENSG00000188211 | NCR3LG1      | 81.61188721 | -1.406711536 | 0.048168565 |
| ENSG00000184361 | SPATA32      | 37.71671292 | -1.398777177 | 0.008082792 |
| ENSG00000284713 | AP003071.5   | 22.42406632 | -1.397835436 | 0.03307678  |
| ENSG00000248124 | RRN3P1       | 82.83546591 | -1.395051041 | 0.005136235 |
| ENSG00000197385 | ZNF860       | 87.9845777  | -1.38757614  | 0.001608827 |
| ENSG00000233672 | RNASEH2B-AS1 | 19.57888334 | -1.38420012  | 0.034711357 |
| ENSG00000267274 | AC008770.4   | 31.4825329  | -1.373242029 | 0.048336309 |
| ENSG00000238018 | AC093110.1   | 46.1463646  | -1.368517914 | 0.013626142 |
| ENSG00000260588 | AC027702.1   | 22.01431668 | -1.346342232 | 0.03665738  |
| ENSG00000269843 | AC008537.2   | 30.76680716 | -1.340352903 | 0.034847674 |
| ENSG00000143702 | CEP170       | 71.18633211 | -1.327174532 | 0.016608293 |
| ENSG00000255557 | AP001266.2   | 25.57006685 | -1.319873607 | 0.043613815 |
| ENSG00000101280 | ANGPT4       | 25.44307981 | -1.309512402 | 0.026990516 |
| ENSG00000092853 | CLSPN        | 31.21431714 | -1.30689744  | 0.027495227 |
| ENSG00000279617 | AC005796.1   | 16.28511008 | -1.301111787 | 0.039566254 |
| ENSG00000258181 | AC008083.3   | 26.72153001 | -1.291031097 | 0.042179725 |
| ENSG00000279933 | AL031595.1   | 32.53835816 | -1.290609766 | 0.030382107 |
| ENSG00000242622 | AC092910.3   | 57.41795047 | -1.285087465 | 0.01174228  |
| ENSG00000256706 | AC005342.2   | 33.99151591 | -1.267336251 | 0.006966348 |
| ENSG00000230454 | U73166.1     | 32.90389661 | -1.251376677 | 0.047168138 |
| ENSG00000268170 | AC073342.2   | 99.87929584 | -1.244867838 | 0.026421488 |
| ENSG00000091622 | PITPNM3      | 33.14630292 | -1.236801706 | 0.042809374 |

|                 |            |             |              |             |
|-----------------|------------|-------------|--------------|-------------|
| ENSG00000132259 | CNGA4      | 25.35007119 | -1.233851495 | 0.042056032 |
| ENSG00000124251 | TP53TG5    | 44.98267913 | -1.222876384 | 0.034186903 |
| ENSG00000233885 | YEATS2-AS1 | 44.95183704 | -1.208598499 | 0.011543061 |
| ENSG00000002745 | WNT16      | 43.88382974 | -1.19479914  | 0.03307716  |
| ENSG00000177932 | ZNF354C    | 156.9074627 | -1.192850406 | 0.006022845 |
| ENSG00000232254 | CSF2RBP1   | 96.4124058  | -1.187193785 | 0.002778189 |
| ENSG00000270168 | AC004233.2 | 30.53236702 | -1.162072578 | 0.032372039 |
| ENSG00000272693 | AC073107.1 | 28.71271822 | -1.161255068 | 0.03080181  |
| ENSG00000232104 | RFX3-AS1   | 40.30264779 | -1.161172299 | 0.037854967 |
| ENSG00000121690 | DEPDC7     | 56.72277861 | -1.157893083 | 0.003483413 |
| ENSG00000164114 | MAP9       | 100.2970703 | -1.155341559 | 0.020458936 |
| ENSG00000118276 | B4GALT6    | 67.92803202 | -1.14596251  | 0.024337153 |
| ENSG00000152782 | PANK1      | 43.94929165 | -1.144810276 | 0.022706785 |
| ENSG00000280035 | AC011676.5 | 60.3916332  | -1.139376108 | 0.015621231 |
| ENSG00000256673 | AC141557.1 | 32.00224676 | -1.133323505 | 0.033258827 |
| ENSG00000170954 | ZNF415     | 40.38407417 | -1.127952067 | 0.035768315 |
| ENSG00000075223 | SEMA3C     | 202.9632559 | -1.119352339 | 0.018923564 |
| ENSG00000258682 | AL132989.1 | 91.74917802 | -1.080943508 | 0.024647673 |
| ENSG00000238005 | AL391832.2 | 156.4291636 | -1.075633437 | 0.010796978 |
| ENSG00000147536 | GINS4      | 60.8286493  | -1.064075095 | 0.002664309 |
| ENSG00000248734 | AC008906.1 | 67.70964487 | -1.061902952 | 0.038374668 |
| ENSG00000267355 | AC022966.1 | 35.72146751 | -1.054577367 | 0.046073222 |
| ENSG00000121769 | FABP3      | 46.22089377 | -1.041349588 | 0.011494545 |
| ENSG00000220804 | LINC01881  | 54.75233426 | -1.022735319 | 0.01407249  |
| ENSG00000260467 | AC018552.2 | 228.2458713 | -1.021803668 | 0.013082117 |
| ENSG00000247950 | SEC24B-AS1 | 38.50983095 | -1.017314551 | 0.038608704 |
| ENSG00000211653 | IGLV1-40   | 111.0586101 | -1.014570721 | 0.012982379 |
| ENSG00000214140 | PRCD       | 67.03984418 | -1.00681932  | 0.012355582 |
| ENSG00000215244 | AL137145.2 | 180.0143804 | -1.003555305 | 3.91E-05    |
| ENSG00000228340 | MIR646HG   | 154.1962487 | -0.989595227 | 0.013283921 |
| ENSG00000205918 | PDPK2P     | 84.5135111  | -0.981979721 | 0.016561658 |
| ENSG00000225963 | AC009950.1 | 349.6390973 | -0.948922526 | 0.04685952  |
| ENSG00000123219 | CENPK      | 191.0361825 | -0.941738949 | 0.045645048 |
| ENSG00000235316 | DUSP8P5    | 79.8036706  | -0.938438264 | 0.037242882 |
| ENSG00000125531 | FNDC11     | 75.49347326 | -0.937615512 | 0.018294207 |
| ENSG00000253981 | ALG1L13P   | 107.743223  | -0.932356461 | 0.015303303 |
| ENSG00000106714 | CNTNAP3    | 760.5874355 | -0.927215475 | 0.007303372 |
| ENSG00000138036 | DYNC2LI1   | 66.55945663 | -0.922469285 | 0.021627834 |
| ENSG00000198707 | CEP290     | 353.1406599 | -0.911455738 | 0.013004147 |
| ENSG00000114346 | ECT2       | 190.5516755 | -0.906376155 | 0.022307219 |
| ENSG00000273599 | AL731571.1 | 181.8961317 | -0.899863067 | 0.03787937  |
| ENSG00000248323 | LUCAT1     | 1512.671993 | -0.886995208 | 0.033278938 |
| ENSG00000211640 | IGLV6-57   | 249.9272966 | -0.886962332 | 0.021211347 |
| ENSG00000207561 | MIR635     | 66.35262017 | -0.88267123  | 0.034294894 |
| ENSG00000211802 | TRAV22     | 84.8963145  | -0.882220852 | 0.010075359 |
| ENSG00000198146 | ZNF770     | 866.4660104 | -0.873715097 | 0.009343472 |
| ENSG00000183822 | NCF4-AS1   | 52.54435032 | -0.870053921 | 0.038256298 |

|                 |            |             |              |             |
|-----------------|------------|-------------|--------------|-------------|
| ENSG00000176659 | C2orf197   | 126.9572232 | -0.868475045 | 0.038482791 |
| ENSG00000246575 | AC093162.2 | 528.9009937 | -0.868001332 | 0.039569775 |
| ENSG00000232284 | GNG12-AS1  | 50.10832566 | -0.861173858 | 0.03945946  |
| ENSG00000268575 | AL031282.2 | 125.3663411 | -0.833615447 | 0.035345606 |
| ENSG00000113638 | TTC33      | 318.579548  | -0.828694275 | 0.020738176 |
| ENSG00000235958 | UBOX5-AS1  | 49.86885832 | -0.828545359 | 0.028905307 |
| ENSG00000064932 | SBNO2      | 1284.555991 | -0.811486839 | 0.018467426 |
| ENSG00000260698 | AL591848.3 | 82.37865508 | -0.807886997 | 0.039389389 |
| ENSG00000224614 | TNK2-AS1   | 102.3811878 | -0.802506937 | 0.025252829 |
| ENSG00000175768 | TOMM5      | 58.30497093 | -0.80213627  | 0.041846103 |
| ENSG00000233527 | ZNF529-AS1 | 96.59567353 | -0.793134872 | 0.018776174 |
| ENSG00000102908 | NFAT5      | 2022.963314 | -0.772265505 | 0.039407282 |
| ENSG00000174405 | LIG4       | 568.8654436 | -0.767579526 | 0.047233841 |
| ENSG00000181690 | PLAG1      | 214.7527968 | -0.760182755 | 0.031667909 |
| ENSG00000204304 | PBX2       | 288.2524289 | -0.756057143 | 0.02632877  |
| ENSG00000214106 | PAXIP1-AS2 | 191.6003932 | -0.755238221 | 0.042871425 |
| ENSG00000166398 | KIAA0355   | 559.0053746 | -0.750494704 | 0.035283448 |
| ENSG00000103154 | NECAB2     | 746.4325668 | -0.744924995 | 0.031897893 |
| ENSG00000155744 | FAM126B    | 3865.326698 | -0.726892099 | 0.026491761 |
| ENSG00000164187 | LMBRD2     | 711.103789  | -0.726520973 | 0.028059541 |
| ENSG00000066651 | TRMT11     | 241.6638512 | -0.722160211 | 0.024239475 |
| ENSG00000213073 | AL353625.1 | 521.3443585 | -0.715325546 | 0.031529315 |
| ENSG00000173889 | PHC3       | 1998.903171 | -0.714572511 | 0.046031798 |
| ENSG00000212743 | AL137145.1 | 120.4644438 | -0.706271711 | 0.036410556 |
| ENSG00000182885 | ADGRG3     | 16042.75561 | -0.670625873 | 0.031890018 |
| ENSG00000230551 | AC021078.1 | 853.2544205 | -0.657062049 | 0.033742613 |
| ENSG00000248996 | AC145098.1 | 1245.761222 | -0.651224863 | 0.046914232 |
| ENSG00000236438 | FAM157A    | 1419.453897 | -0.644627598 | 0.032666491 |
| ENSG00000135960 | EDAR       | 303.9603979 | -0.638168301 | 0.009000121 |
| ENSG00000188227 | ZNF793     | 221.3487781 | -0.631870857 | 0.042393516 |
| ENSG00000184557 | SOCS3      | 3267.552673 | -0.60339408  | 0.01535406  |
| ENSG00000211666 | IGLV2-14   | 1318.219767 | -0.596517428 | 0.013375283 |
| ENSG00000129116 | PALLD      | 244.2940454 | -0.593024346 | 0.044338343 |
| ENSG00000253106 | AC090198.1 | 165.1119822 | -0.579786512 | 0.036065726 |
| ENSG00000124549 | BTN2A3P    | 166.6829289 | -0.55753992  | 0.027144913 |
| ENSG00000203666 | EFCAB2     | 216.3164556 | -0.536619877 | 0.04359976  |
| ENSG00000163534 | FCRL1      | 1749.851093 | -0.535353696 | 0.039089054 |
| ENSG00000183762 | KREMEN1    | 2792.205045 | -0.517687594 | 0.038841519 |
| ENSG00000251247 | ZNF345     | 327.5269836 | -0.488431754 | 0.049132655 |
| ENSG00000265666 | RARA-AS1   | 646.5682209 | -0.482349355 | 0.04357455  |
| ENSG00000114904 | NEK4       | 537.4001497 | -0.467589063 | 0.040863337 |
| ENSG00000197619 | ZNF615     | 365.8381741 | -0.458724163 | 0.048938924 |
| ENSG00000196967 | ZNF585A    | 387.0113172 | -0.448958741 | 0.038449189 |
| ENSG00000087157 | PGS1       | 6583.709162 | -0.412030125 | 0.030705675 |
| ENSG00000185219 | ZNF445     | 1987.738491 | -0.410727106 | 0.020496839 |
| ENSG00000136940 | PDCL       | 691.7029417 | -0.385611529 | 0.024393255 |
| ENSG00000198960 | ARMCX6     | 611.7810975 | 0.380638524  | 0.025775562 |

|                 |            |             |             |             |
|-----------------|------------|-------------|-------------|-------------|
| ENSG00000049449 | RCN1       | 598.3146158 | 0.388977802 | 0.043953274 |
| ENSG00000170260 | ZNF212     | 1270.102748 | 0.389845705 | 0.012901096 |
| ENSG00000279884 | AC010894.5 | 554.3754521 | 0.402924429 | 0.042771776 |
| ENSG00000100372 | SLC25A17   | 719.7294862 | 0.415250358 | 0.037478575 |
| ENSG00000196914 | ARHGEF12   | 1168.333583 | 0.430200305 | 0.038751681 |
| ENSG00000114473 | IQCG       | 220.2088672 | 0.430498931 | 0.044218441 |
| ENSG00000172006 | ZNF554     | 284.6725781 | 0.437851116 | 0.049811108 |
| ENSG00000149218 | ENDOD1     | 964.0961741 | 0.441713201 | 0.015518204 |
| ENSG00000169398 | PTK2       | 472.9972521 | 0.455170569 | 0.04080771  |
| ENSG00000134297 | PLEKHA8P1  | 239.2899869 | 0.456219546 | 0.04617401  |
| ENSG00000099284 | H2AFY2     | 246.6118719 | 0.458743445 | 0.048352656 |
| ENSG00000136463 | TACO1      | 699.5119901 | 0.459817238 | 0.040675068 |
| ENSG00000156804 | FBXO32     | 1010.481509 | 0.464987711 | 0.024209738 |
| ENSG00000182518 | FAM104B    | 227.5080281 | 0.474906888 | 0.044532402 |
| ENSG00000066926 | FECH       | 1362.23167  | 0.475478182 | 0.027873664 |
| ENSG00000127922 | SEM1       | 414.0448934 | 0.494589407 | 0.038652258 |
| ENSG00000143507 | DUSP10     | 350.5475133 | 0.497668264 | 0.034942941 |
| ENSG00000221926 | TRIM16     | 185.8949037 | 0.506537603 | 0.033858003 |
| ENSG00000185986 | SDHAP3     | 229.1002069 | 0.51600349  | 0.031221277 |
| ENSG00000149485 | FADS1      | 647.1658718 | 0.518814481 | 0.025589961 |
| ENSG00000109534 | GAR1       | 649.4383404 | 0.52184554  | 0.021812006 |
| ENSG00000120129 | DUSP1      | 16794.93657 | 0.532505561 | 0.019011235 |
| ENSG00000168785 | TSPAN5     | 2233.05023  | 0.532943597 | 0.015577544 |
| ENSG00000112578 | BYSL       | 410.9333913 | 0.540160645 | 0.004554731 |
| ENSG00000154917 | RAB6B      | 151.928857  | 0.547434208 | 0.038717653 |
| ENSG00000184221 | OLIG1      | 1401.564037 | 0.552947865 | 0.025416833 |
| ENSG00000169397 | RNASE3     | 336.7563732 | 0.567164361 | 0.041423859 |
| ENSG00000229754 | CXCR2P1    | 1292.54045  | 0.567317401 | 0.033684314 |
| ENSG00000269973 | AC010969.2 | 216.0247873 | 0.570601818 | 0.031015982 |
| ENSG00000138735 | PDE5A      | 335.1180145 | 0.576096804 | 0.037462805 |
| ENSG00000165914 | TTC7B      | 308.9129163 | 0.57976758  | 0.021490864 |
| ENSG00000123427 | EEF1AKMT3  | 176.082083  | 0.592435874 | 0.02829094  |
| ENSG00000065534 | MYLK       | 410.3888366 | 0.60479785  | 0.030545336 |
| ENSG00000049759 | NEDD4L     | 322.0048152 | 0.606254851 | 0.036824773 |
| ENSG00000242732 | RTL5       | 265.4024036 | 0.606496742 | 0.031782822 |
| ENSG00000100298 | APOBEC3H   | 154.5289897 | 0.626733645 | 0.039512949 |
| ENSG00000072195 | SPEG       | 388.68336   | 0.647227453 | 0.030215675 |
| ENSG00000095397 | WHRN       | 336.6931058 | 0.647824869 | 0.030496487 |
| ENSG00000261662 | AL359752.1 | 166.1040528 | 0.653759161 | 0.030087725 |
| ENSG00000158292 | GPR153     | 163.088413  | 0.659566605 | 0.049610906 |
| ENSG00000119705 | SLIRP      | 226.4901348 | 0.66068593  | 0.011083872 |
| ENSG00000182253 | SYNM       | 123.8961186 | 0.67033774  | 0.033141352 |
| ENSG00000196565 | HBG2       | 13041.09831 | 0.67274568  | 0.025379823 |
| ENSG00000264577 | AC010761.1 | 90.74400327 | 0.674064242 | 0.043409259 |
| ENSG00000167768 | KRT1       | 1540.701664 | 0.678142674 | 0.031799067 |
| ENSG00000136842 | TMOD1      | 348.7151286 | 0.679697796 | 0.027665473 |
| ENSG00000238243 | OR2W3      | 615.7634529 | 0.694682472 | 0.017665148 |

|                 |            |             |             |             |
|-----------------|------------|-------------|-------------|-------------|
| ENSG00000251136 | AF117829.1 | 123.6252482 | 0.704207193 | 0.021110747 |
| ENSG00000157514 | TSC22D3    | 62233.2147  | 0.70645136  | 0.000472417 |
| ENSG00000082146 | STRADB     | 8959.25145  | 0.729987593 | 0.002775273 |
| ENSG00000278828 | HIST1H3H   | 917.2629981 | 0.730696437 | 0.015345303 |
| ENSG00000260228 | AC009119.1 | 74.90944229 | 0.733755252 | 0.022302232 |
| ENSG00000254614 | AP003068.2 | 346.6391902 | 0.734389461 | 0.005580266 |
| ENSG00000047597 | XK         | 286.2659247 | 0.743389184 | 0.008659809 |
| ENSG00000162367 | TAL1       | 1306.733323 | 0.744204839 | 0.006094961 |
| ENSG00000047648 | ARHGAP6    | 87.07858072 | 0.744551463 | 0.044392362 |
| ENSG00000198513 | ATL1       | 60.23608883 | 0.7447883   | 0.043064486 |
| ENSG00000104518 | GSDMD      | 483.0866264 | 0.746583319 | 0.033712822 |
| ENSG00000119326 | CTNNAL1    | 157.4676921 | 0.747414303 | 0.015591989 |
| ENSG00000270696 | AC005034.3 | 202.2556666 | 0.749121451 | 0.004290546 |
| ENSG00000175518 | UBQLNL     | 87.56379891 | 0.749292226 | 0.041986148 |
| ENSG00000255422 | AP002954.1 | 72.84278755 | 0.753447168 | 0.019107269 |
| ENSG00000005471 | ABCB4      | 162.7377995 | 0.756048535 | 0.028979137 |
| ENSG00000243064 | ABCC13     | 306.037995  | 0.760098694 | 0.041977186 |
| ENSG00000103044 | HAS3       | 109.4476273 | 0.762034451 | 0.007105092 |
| ENSG00000004939 | SLC4A1     | 14929.72318 | 0.767863553 | 0.023350654 |
| ENSG00000185630 | PBX1       | 311.2270924 | 0.779283849 | 0.01006964  |
| ENSG00000141252 | VPS53      | 259.6346887 | 0.78631672  | 0.017363904 |
| ENSG00000273117 | AC144652.1 | 98.47719132 | 0.791832696 | 0.008000173 |
| ENSG00000266904 | LINC00663  | 147.853657  | 0.792521015 | 0.014319532 |
| ENSG00000105507 | CABP5      | 107.8515884 | 0.795957334 | 0.020979109 |
| ENSG00000204947 | ZNF425     | 99.35081744 | 0.808799346 | 0.008477966 |
| ENSG00000204872 | NAT8B      | 93.23692253 | 0.810506754 | 0.034922872 |
| ENSG00000225460 | AL590233.1 | 81.88303804 | 0.813768818 | 0.032713617 |
| ENSG00000149516 | MS4A3      | 405.2107097 | 0.817349785 | 0.025401291 |
| ENSG00000204010 | IFIT1B     | 477.02136   | 0.824610923 | 0.016340646 |
| ENSG00000177465 | ACOT4      | 72.47421929 | 0.825778492 | 0.016835845 |
| ENSG00000259250 | AC018904.1 | 129.6417445 | 0.840135886 | 0.002812538 |
| ENSG00000260101 | AC008074.3 | 58.05511419 | 0.842011647 | 0.029316754 |
| ENSG00000197465 | GYPE       | 76.54000182 | 0.873056653 | 0.021531851 |
| ENSG00000242445 | RPL7AP11   | 46.88565082 | 0.87944954  | 0.036751275 |
| ENSG00000185338 | SOCS1      | 438.16997   | 0.896952486 | 0.021568179 |
| ENSG00000164821 | DEFA4      | 440.7990706 | 0.897234402 | 0.005989257 |
| ENSG00000170412 | GPRC5C     | 55.66061941 | 0.926273809 | 0.038078154 |
| ENSG00000211667 | IGLV3-12   | 98.8945107  | 0.936099103 | 0.039213412 |
| ENSG00000164082 | GRM2       | 55.3070003  | 0.94224018  | 0.038057379 |
| ENSG00000187244 | BCAM       | 66.26811487 | 0.947030871 | 0.040708095 |
| ENSG00000087884 | AAMDC      | 62.05384813 | 0.949431676 | 0.015561487 |
| ENSG00000206047 | DEFA1      | 338.4112289 | 0.952931081 | 0.009112747 |
| ENSG00000166033 | HTRA1      | 45.11159874 | 0.954820193 | 0.040528033 |
| ENSG00000236830 | CBR3-AS1   | 50.19204916 | 0.956439465 | 0.011346834 |
| ENSG00000170835 | CEL        | 46.71402651 | 0.957358562 | 0.037664628 |
| ENSG00000179094 | PER1       | 2516.978218 | 0.963778249 | 0.001264418 |
| ENSG00000151491 | EPS8       | 102.6946251 | 0.965270503 | 0.034220435 |

|                 |            |             |             |             |
|-----------------|------------|-------------|-------------|-------------|
| ENSG00000224177 | LINC00570  | 219.3156536 | 1.001731353 | 0.003418908 |
| ENSG00000282608 | ADORA3     | 431.1475726 | 1.009048925 | 0.003325294 |
| ENSG00000240914 | AL121612.1 | 31.45135821 | 1.009049054 | 0.045704542 |
| ENSG00000166831 | RBPMS2     | 46.97243492 | 1.009314247 | 0.03205491  |
| ENSG00000267871 | AC005261.1 | 54.81710619 | 1.018033479 | 0.006940496 |
| ENSG00000275772 | AC244157.2 | 61.37736487 | 1.027096888 | 0.027058433 |
| ENSG00000189238 | LINC00943  | 46.13151961 | 1.035621218 | 0.037263732 |
| ENSG00000280047 | AC091825.1 | 100.5196548 | 1.042219077 | 0.006506123 |
| ENSG00000231369 | Z97353.1   | 32.73833722 | 1.042685126 | 0.037005961 |
| ENSG00000168004 | HRASLS5    | 66.94362283 | 1.053129036 | 0.023981332 |
| ENSG00000277218 | AL139123.1 | 29.34695994 | 1.057253568 | 0.033157414 |
| ENSG00000272799 | AC006238.1 | 37.60920056 | 1.062829641 | 0.012698346 |
| ENSG00000145423 | SFRP2      | 120.219956  | 1.07503622  | 0.046781253 |
| ENSG00000171189 | GRIK1      | 29.97186209 | 1.126987057 | 0.03463052  |
| ENSG00000272338 | AC067838.1 | 48.13680812 | 1.127163376 | 0.022130763 |
| ENSG00000198680 | TUSC1      | 31.99222202 | 1.138496676 | 0.017545365 |
| ENSG00000266401 | AP002478.1 | 37.31576377 | 1.143786882 | 0.037127588 |
| ENSG00000165917 | RAPSN      | 58.73742914 | 1.155421735 | 0.015788118 |
| ENSG00000276517 | AL133243.3 | 34.49144772 | 1.161078811 | 0.011465076 |
| ENSG00000234902 | AC007879.3 | 30.20115893 | 1.179772017 | 0.035207527 |
| ENSG00000273619 | AL121832.2 | 42.77264894 | 1.180538376 | 0.012191789 |
| ENSG00000133116 | KL         | 27.58149907 | 1.183496129 | 0.038766287 |
| ENSG00000203780 | FANK1      | 28.43787642 | 1.192772819 | 0.02783105  |
| ENSG00000116096 | SPR        | 82.93657869 | 1.197623247 | 0.001359245 |
| ENSG00000196188 | CTSE       | 42.58848105 | 1.198715569 | 0.029463084 |
| ENSG00000124780 | KCNK17     | 51.78239821 | 1.201707306 | 0.007894475 |
| ENSG00000186081 | KRT5       | 60.09303494 | 1.210126506 | 0.022154808 |
| ENSG00000180815 | MAP3K15    | 29.37574662 | 1.214724912 | 0.02139202  |
| ENSG00000140022 | STON2      | 126.9894009 | 1.226562665 | 0.000546196 |
| ENSG00000198848 | CES1       | 182.9582534 | 1.230355241 | 0.004127646 |
| ENSG00000267934 | AC010300.1 | 25.21387773 | 1.248542373 | 0.037543428 |
| ENSG00000102904 | TSNAXIP1   | 26.18968039 | 1.254781839 | 0.019795509 |
| ENSG00000237989 | LINC01679  | 48.45188539 | 1.255970467 | 0.008893125 |
| ENSG00000153531 | ADPRHL1    | 38.09420086 | 1.271264548 | 0.018526578 |
| ENSG00000273628 | AL354798.1 | 15.78420886 | 1.291578161 | 0.033461235 |
| ENSG00000276968 | AL158196.1 | 23.5395713  | 1.293957372 | 0.035220209 |
| ENSG00000179914 | ITLN1      | 66.67710374 | 1.294328085 | 0.001413848 |
| ENSG00000170421 | KRT8       | 20.60627481 | 1.30546018  | 0.046289825 |
| ENSG00000263823 | AC009831.1 | 31.72753387 | 1.31115065  | 0.01664724  |
| ENSG00000167306 | MYO5B      | 34.18464741 | 1.320580456 | 0.019475817 |
| ENSG00000197279 | ZNF165     | 27.50462096 | 1.325822617 | 0.022636022 |
| ENSG00000266601 | AC018521.6 | 33.24456814 | 1.33103144  | 0.005727683 |
| ENSG00000163923 | RPL39L     | 50.57310296 | 1.337885714 | 0.027681889 |
| ENSG00000262636 | AC099489.2 | 20.38714576 | 1.347339146 | 0.039026546 |
| ENSG00000270084 | GAS5-AS1   | 22.65774076 | 1.357649039 | 0.036189159 |
| ENSG00000279265 | AC000123.2 | 35.41783187 | 1.365223272 | 0.01354018  |
| ENSG00000153558 | FBXL2      | 46.74409673 | 1.365800975 | 0.012365063 |



|                 |            |             |             |             |
|-----------------|------------|-------------|-------------|-------------|
| ENSG00000261187 | AC079322.1 | 23.21149936 | 1.398987269 | 0.018146266 |
| ENSG00000214357 | NEURL1B    | 27.10085496 | 1.404992697 | 0.032207459 |
| ENSG00000006704 | GTF2IRD1   | 15.13550891 | 1.425849421 | 0.036625164 |
| ENSG00000283317 | AL831711.1 | 27.12608148 | 1.433688858 | 0.015604156 |
| ENSG00000272009 | AL121944.1 | 22.70940002 | 1.434860457 | 0.034472982 |
| ENSG00000172572 | PDE3A      | 14.32621935 | 1.447135751 | 0.045297066 |
| ENSG00000283399 | AC004381.2 | 32.27254825 | 1.484847479 | 0.037431286 |
| ENSG00000250471 | GMPSP1     | 20.92229564 | 1.485007659 | 0.013346373 |
| ENSG00000149201 | CCDC81     | 16.05949667 | 1.487951776 | 0.04709634  |
| ENSG00000272902 | TBC1D8-AS1 | 14.80255807 | 1.495318461 | 0.039883122 |
| ENSG00000283236 | AC074141.1 | 41.78728994 | 1.50950144  | 0.007154021 |
| ENSG00000261097 | LINC00563  | 18.88020204 | 1.512735561 | 0.037021165 |
| ENSG00000234705 | HMGA1P4    | 17.97261078 | 1.515443545 | 0.040124015 |
| ENSG00000235001 | EIF4A1P2   | 33.81299804 | 1.525642722 | 0.009464612 |
| ENSG00000235478 | LINC01664  | 13.77122555 | 1.535577259 | 0.045784952 |
| ENSG00000157554 | ERG        | 26.00491508 | 1.540080899 | 0.022732362 |
| ENSG00000189253 | TRIM64B    | 32.0644654  | 1.540364983 | 0.042930548 |
| ENSG00000183742 | MACC1      | 23.91179322 | 1.546059145 | 0.044154449 |
| ENSG00000130037 | KCNA5      | 14.50309697 | 1.548786576 | 0.042736137 |
| ENSG00000065618 | COL17A1    | 36.03297275 | 1.566418849 | 0.006442557 |
| ENSG00000211454 | AKR7L      | 12.73378732 | 1.568021832 | 0.041093808 |
| ENSG00000258521 | AL157871.2 | 27.02359887 | 1.568793674 | 0.009564059 |
| ENSG00000229785 | SLC25A38P1 | 14.17478569 | 1.573870386 | 0.039286967 |
| ENSG00000284052 | AC006460.2 | 22.5932895  | 1.599779275 | 0.020530395 |
| ENSG00000274191 | AC026333.4 | 13.75151366 | 1.610636391 | 0.034686345 |
| ENSG00000275484 | AP003419.4 | 24.40242093 | 1.64165441  | 0.021522293 |
| ENSG00000155066 | PROM2      | 14.51946402 | 1.665982055 | 0.012143753 |
| ENSG00000118473 | SGIP1      | 21.00398441 | 1.685543473 | 0.025261111 |
| ENSG00000273483 | AL354760.1 | 12.10081386 | 1.687029195 | 0.018495183 |
| ENSG00000221955 | SLC12A8    | 14.28566705 | 1.694576736 | 0.024380105 |
| ENSG00000163885 | CFAP100    | 13.19314729 | 1.699242768 | 0.015868381 |
| ENSG00000150672 | DLG2       | 14.3393169  | 1.704192332 | 0.026775277 |
| ENSG00000113645 | WWC1       | 26.54493371 | 1.716675089 | 0.003131341 |
| ENSG00000272163 | AF106564.1 | 11.15085935 | 1.726609913 | 0.049427915 |
| ENSG00000237575 | PYY2       | 17.43240338 | 1.72984158  | 0.034932296 |
| ENSG00000217702 | AC073263.1 | 12.13458584 | 1.739603613 | 0.047681129 |
| ENSG00000130656 | HBZ        | 98.64585819 | 1.776533358 | 0.012201404 |
| ENSG00000140534 | TICRR      | 13.11480955 | 1.784871165 | 0.026300272 |
| ENSG00000127252 | HRASLS     | 14.2477804  | 1.790934409 | 0.030036959 |
| ENSG00000197993 | KEL        | 25.38376008 | 1.814856606 | 0.030990144 |
| ENSG00000118939 | UCHL3      | 17.00678459 | 1.830672064 | 0.035942625 |
| ENSG00000130023 | ERMARD     | 107.6250819 | 1.85495271  | 0.014988511 |
| ENSG00000275719 | AC008622.2 | 7.901438    | 1.858861579 | 0.047592402 |
| ENSG00000109321 | AREG       | 31.46733587 | 1.862953954 | 0.046581212 |
| ENSG00000223711 | AC069213.1 | 18.23772988 | 1.875017031 | 0.009182078 |
| ENSG00000270194 | AC097359.2 | 13.10602261 | 1.892854044 | 0.04101691  |
| ENSG00000206557 | TRIM71     | 9.67980565  | 1.909965825 | 0.022553239 |

|                 |              |             |             |             |
|-----------------|--------------|-------------|-------------|-------------|
| ENSG00000172348 | RCAN2        | 17.74955232 | 1.914587761 | 0.025789284 |
| ENSG00000239203 | AC093484.1   | 15.10196783 | 1.930501809 | 0.03012121  |
| ENSG00000254502 | AP003097.1   | 9.967130479 | 1.934552333 | 0.034022063 |
| ENSG00000165996 | HACD1        | 27.66130098 | 1.936009243 | 0.000306361 |
| ENSG00000226686 | LINC01535    | 9.426509122 | 1.949191744 | 0.039014741 |
| ENSG00000170180 | GYPA         | 29.30206582 | 1.957804033 | 0.009541718 |
| ENSG00000225992 | TRGVA        | 13.59346438 | 1.988029769 | 0.007398392 |
| ENSG00000121594 | CD80         | 16.30876057 | 1.999096102 | 0.012963125 |
| ENSG00000182057 | OGFRP1       | 21.66324966 | 2.003217095 | 0.001534589 |
| ENSG00000260082 | AC106886.1   | 9.781949697 | 2.011137708 | 0.028699218 |
| ENSG00000262482 | AC004034.1   | 12.18343255 | 2.03168877  | 0.037058284 |
| ENSG00000257557 | PPP1R12A-AS1 | 13.76724709 | 2.098434144 | 0.014284718 |
| ENSG00000183722 | LHFPL6       | 10.4776609  | 2.111944225 | 0.02304623  |
| ENSG00000258659 | TRIM34       | 14.04807362 | 2.142146449 | 0.009167226 |
| ENSG00000274736 | CCL23        | 25.7867236  | 2.159836754 | 0.002733176 |
| ENSG00000275763 | C18orf65     | 13.53017753 | 2.163253117 | 0.008947303 |
| ENSG00000125845 | BMP2         | 10.16063454 | 2.183369524 | 0.021002116 |
| ENSG00000264968 | AC090844.2   | 20.61065043 | 2.201227966 | 0.00192505  |
| ENSG00000164684 | ZNF704       | 8.537695439 | 2.213206389 | 0.037995924 |
| ENSG00000258469 | CHMP4BP1     | 50.36435517 | 2.238612217 | 0.006775824 |
| ENSG00000258534 | AL132712.1   | 13.60741125 | 2.242829684 | 0.029012919 |
| ENSG00000254593 | OR7E126P     | 10.50697172 | 2.245270014 | 0.044878553 |
| ENSG00000122870 | BICC1        | 10.29643756 | 2.28676095  | 0.010780586 |
| ENSG00000143816 | WNT9A        | 9.978384183 | 2.307766566 | 0.037371488 |
| ENSG00000273139 | AC007663.3   | 8.386398985 | 2.324298979 | 0.013687319 |
| ENSG00000271938 | AC103724.4   | 9.18848197  | 2.340699483 | 0.025101947 |
| ENSG00000261448 | AC109446.3   | 10.08080699 | 2.35065396  | 0.028831951 |
| ENSG00000124564 | SLC17A3      | 11.76890835 | 2.37589379  | 0.009823396 |
| ENSG00000158865 | SLC5A11      | 14.65628692 | 2.391640227 | 0.013091953 |
| ENSG00000198576 | ARC          | 9.531038961 | 2.415655488 | 0.006604033 |
| ENSG00000204394 | VARS         | 32.06626838 | 2.445809578 | 0.002660419 |
| ENSG00000211884 | TRAJ5        | 8.649184198 | 2.50358209  | 0.032911442 |
| ENSG00000248719 | AC021127.1   | 8.04053181  | 2.514040445 | 0.034865738 |
| ENSG00000189045 | ANKDD1B      | 15.09165016 | 2.515025208 | 0.010827443 |
| ENSG00000077935 | SMC1B        | 15.83418691 | 2.519135742 | 0.004172445 |
| ENSG00000085552 | IGSF9        | 10.59884805 | 2.522148074 | 0.008044344 |
| ENSG00000166823 | MESP1        | 12.60621619 | 2.530526743 | 0.013029757 |
| ENSG00000223901 | AP001469.1   | 8.161894986 | 2.546558036 | 0.021886355 |
| ENSG00000105865 | DUS4L        | 10.39239889 | 2.672023355 | 0.005571679 |
| ENSG00000242220 | TCP10L       | 9.712899575 | 2.806498825 | 0.005236929 |
| ENSG00000105997 | HOXA3        | 7.418815671 | 2.808490782 | 0.018181627 |
| ENSG00000271967 | AL583856.2   | 12.76749818 | 2.901220304 | 0.001927124 |
| ENSG00000278978 | AC092611.3   | 10.46148567 | 2.968613876 | 0.003471012 |
| ENSG00000223929 | MIR4432HG    | 10.15138831 | 3.521992404 | 0.005631628 |
